# Supplementary material for: Active Case Finding for Communicable Diseases in Prison Settings: Increasing Testing Coverage and Uptake Among the Prison Population in the European Union/European Economic Area
Source: PubMed Central journal article supplement — Epidemiol Rev. 2018 Apr 10;40(1):105–20. doi: 10.1093/epirev/mxy001 (PMC5982719; doi:10.1093/epirev/mxy001), 2018-04-10
Supplement: mxy001tavoschiwebmaterialfinal.pdf [file mxy001tavoschiwebmaterialfinal.pdf]

Active case finding for communicable diseases in  
prison settings: increasing testing coverage and  
uptake among the prison population in the  
EU/EEA

Web Appendix

## Web Appendix 1. Review objectives and questions

Web Table 1: PICO table

| <b>Active case finding for selected communicable diseases at entrance and during prison stay</b> |                                                                                                                                                                                                                                                                                                                                                                                                                                                                                                                                                                   |
|--------------------------------------------------------------------------------------------------|-------------------------------------------------------------------------------------------------------------------------------------------------------------------------------------------------------------------------------------------------------------------------------------------------------------------------------------------------------------------------------------------------------------------------------------------------------------------------------------------------------------------------------------------------------------------|
| P                                                                                                | Adult individuals (≥18 years) in prison settings (i.e. those detained and those who work in prison settings (“going through the gate”))                                                                                                                                                                                                                                                                                                                                                                                                                           |
| I                                                                                                | Active case finding for communicable diseases at entrance and during prison stay (including at release)                                                                                                                                                                                                                                                                                                                                                                                                                                                           |
| C                                                                                                | <ul style="list-style-type: none"> <li>- Comparison with no intervention;</li> <li>- Comparison with alternative intervention;</li> <li>- No comparison;</li> <li>- Comparison between populations in prison settings (e.g. between different prison types, risk groups, etc.)</li> <li>- Comparison with community setting</li> </ul>                                                                                                                                                                                                                            |
| O                                                                                                | <p><i>Qualitative outcomes:</i></p> <ul style="list-style-type: none"> <li>Accessibility</li> <li>Feasibility and acceptability of active case finding at entrance and during prison stay</li> <li>Qualitative description of interventions/modes of service delivery</li> </ul> <p><i>Quantitative outcomes:</i></p> <ul style="list-style-type: none"> <li>Uptake (number of persons screened)</li> <li>Positivity rate</li> <li>Measures of effectiveness (e.g. change in communicable disease incidence or prevalence)</li> <li>Cost-effectiveness</li> </ul> |
| S                                                                                                | Prisons, jails and other custodial settings with a function as prison (excluding migrant centres and police detention rooms)                                                                                                                                                                                                                                                                                                                                                                                                                                      |

Review questions:

- What are the communicable diseases that are covered by active case finding?
- Which types of active case finding modalities are effective?
- Which service models for active case finding interventions are effective?
- Which types of active case finding modalities are cost-effective?
- Which service models for active case finding interventions are cost-effective?
- What is the acceptance of active case finding?
- How to improve the acceptance of active case finding testing?
- Who should be targeted for active case finding, when and how often?

## Web Appendix 2. Peer reviewed literature search

The search strategy was developed building on the scoping phase by ECDC with respect to using PubMed and Embase (Embase.com) as peer-reviewed data sources. Additionally, the Cochrane Library database was searched for systematic reviews and economic evaluations.

### **Search strings**

In order to find relevant articles for the macro areas in PubMed and Embase.com, search strings were developed for each of the following concepts:

1. Prisons, jails and other custodial settings
2. Active case finding

In PubMed and Embase.com search string #1 was combined using “AND” with string #2 (i.e. #1 AND #2).

For Cochrane Library one generic search using the terms for prisons was used to search for all relevant systematic reviews and economic evaluations.

### **PUBMED**

**#1 Prisons and other custodial settings:** "Prisons"[Mesh] OR "Prisoners"[Mesh] OR prison\*[tw] OR penal[tw] OR jail\*[tw] OR reformatory\*[tw] OR custodial[tw] OR custody[tw] OR gaol\*[tw] OR remand\*[tw] OR penitentiary\*[tw] OR detention\*[tw] OR correctional[tw] OR detainee\*[tw] OR inmate\*[tw] OR imprison\*[tw] OR confinement[tw] OR incarcerat\*[tw] OR cellmate\*[tw]

**#2 Active case finding:** "Mass Screening"[Mesh] OR "Mandatory Testing"[Mesh] OR screen\*[tw] OR "case finding"[tw] OR "case-finding"[tw] OR casefinding[tw] OR "cases finding"[tw] OR "case identification"[tw] OR "cases identification"[tw] OR testing[tw] OR "rapid test"[tw] OR "rapid tests"[tw] OR "Early diagnosis"[Mesh] OR early diagnos\*[tw] OR early detect\*[tw] OR early test\*[tw] OR "clinical evaluation"[tw] OR "clinical evaluations"[tw]

## EMBASE.COM

**#1 Prisons and other custodial settings:** 'prison'/exp OR 'prisoner'/exp OR prison\*:ti,ab OR penal:ti,ab OR jail\*:ti,ab OR reformato\*:ti,ab OR custodial:ti,ab OR custody:ti,ab OR gaol\*:ti,ab OR remand\*:ti,ab OR penitentiari\*:ti,ab OR detention\*:ti,ab OR correctional:ti,ab OR detainee\*:ti,ab OR inmate\*:ti,ab OR imprison\*:ti,ab OR confinement:ti,ab OR incarcerat\*:ti,ab OR cellmate\*:ti,ab

**#2 Active case finding:** 'mass screening'/exp OR 'screening test'/exp OR 'screening'/de OR 'mandatory testing'/exp OR screen\*:ti,ab OR 'case finding'/exp OR "case finding":ti,ab OR "case-finding":ti,ab OR casefinding:ti,ab OR "cases finding":ti,ab OR "case identification":ti,ab OR "cases identification":ti,ab OR testing:ti,ab OR "rapid test":ti,ab OR "rapid tests":ti,ab OR 'early diagnosis'/exp OR early diagnos\*:ti,ab OR early detect\*:ti,ab OR early test\*:ti,ab OR "clinical evaluation"/exp OR "clinical evaluation":ti,ab OR "clinical evaluations":ti,ab

## COCHRANE LIBRARY

**#1 Prisons and other custodial settings:** MeSH descriptor: [prisons] explode all trees OR MeSH descriptor: [prisoners] explode all trees OR prison\*:ti,ab,kw OR penal:ti,ab,kw OR jail\*:ti,ab,kw OR reformato\*:ti,ab,kw OR custodial:ti,ab,kw OR custody:ti,ab,kw OR gaol\*:ti,ab,kw OR remand\*:ti,ab,kw OR penitentiari\*:ti,ab,kw OR detention\*:ti,ab,kw OR correctional:ti,ab,kw OR detainee\*:ti,ab,kw OR inmate\*:ti,ab,kw OR imprison\*:ti,ab,kw OR confinement:ti,ab,kw OR incarcerat\*:ti,ab,kw OR cellmate\*:ti,ab,kw

## ***Inclusion and exclusion criteria***

**Web Table 2. Inclusion and exclusion criteria peer-reviewed literature**

|                               | <b>Inclusion</b>                                                                                                                                                                                                                                                                                                                                                                              | <b>Exclusion</b>                                                                                                                                                                                                                                                                                                                                                                                                                                                                     |
|-------------------------------|-----------------------------------------------------------------------------------------------------------------------------------------------------------------------------------------------------------------------------------------------------------------------------------------------------------------------------------------------------------------------------------------------|--------------------------------------------------------------------------------------------------------------------------------------------------------------------------------------------------------------------------------------------------------------------------------------------------------------------------------------------------------------------------------------------------------------------------------------------------------------------------------------|
| Study design/<br>type         | <ul style="list-style-type: none"> <li>• Meta-analysis or systematic review<sup>1</sup></li> <li>• Randomised controlled trials (RCTs)</li> <li>• Non-randomised, prospective comparative studies</li> <li>• Prospective observational studies (e.g. cohort studies)</li> <li>• Retrospective observational studies (e.g. case-control studies)</li> <li>• Cross-sectional studies</li> </ul> | <ul style="list-style-type: none"> <li>• Narrative review</li> <li>• Case reports</li> <li>• Non-pertinent publication types (e.g. expert opinions, letters to the editor, editorials, comments, conference abstract/poster, news, consensus document, chapter)</li> <li>• Animal studies</li> <li>• Genetic studies, biochemistry or molecular studies</li> <li>• Modelling studies (i.e. this did not apply to economic evaluation studies)</li> <li>• Outbreak studies</li> </ul> |
| Study quality                 | <ul style="list-style-type: none"> <li>• Study duration (no minimum)</li> <li>• Number of subjects (no minimum)</li> </ul>                                                                                                                                                                                                                                                                    | <ul style="list-style-type: none"> <li>• Insufficient methodological quality (both inherent methodology as well as insufficient description of inherent methodology provided; based on quality checklists)</li> </ul>                                                                                                                                                                                                                                                                |
| Study population              | Adults in prisons, jails and other custodial settings that function as a prison <ul style="list-style-type: none"> <li>• Detained persons, including persons in remand</li> <li>• Persons "going through the gate" (e.g. prison guards, healthcare workers, etc.)</li> </ul>                                                                                                                  | <ul style="list-style-type: none"> <li>• Children (&lt;18 years)</li> <li>• Persons in police custody</li> <li>• Persons in migrant detention centres</li> </ul>                                                                                                                                                                                                                                                                                                                     |
| Geographical area             | <ul style="list-style-type: none"> <li>• EU/EEA + candidate countries, EFTA and other high-income countries (i.e. USA, Canada, Australia, New Zealand)</li> </ul>                                                                                                                                                                                                                             |                                                                                                                                                                                                                                                                                                                                                                                                                                                                                      |
| Study comparison              | <ul style="list-style-type: none"> <li>• Comparison appropriate for a specific outcome</li> </ul>                                                                                                                                                                                                                                                                                             |                                                                                                                                                                                                                                                                                                                                                                                                                                                                                      |
| Specific outcomes of interest | <ul style="list-style-type: none"> <li>• Quantitative outcomes</li> <li>• Qualitative outcomes</li> </ul>                                                                                                                                                                                                                                                                                     | <ul style="list-style-type: none"> <li>• No exclusion based on outcomes</li> </ul>                                                                                                                                                                                                                                                                                                                                                                                                   |

<sup>1</sup>High-quality meta-analyses or systematic reviews were included in case they matched the review objectives. If not, the relevant individual articles from these meta-analyses/systematic reviews were checked. If an individual article reported new and relevant data and the study was of sufficient quality, it was included.

## Web Appendix 3. Quality appraisal checklists other than NICE

### Cross-sectional study

Code as -- / - / + - / + / ++ or NA if not applicable

|                                                                                                                                           |  |
|-------------------------------------------------------------------------------------------------------------------------------------------|--|
| <b>Author</b>                                                                                                                             |  |
| <b>Countries</b>                                                                                                                          |  |
| <b>Internal validity</b>                                                                                                                  |  |
| The study addresses an appropriate and clearly focused question                                                                           |  |
| The study population is clearly described                                                                                                 |  |
| The population is a representative sample of the source population                                                                        |  |
| The outcome measures are described                                                                                                        |  |
| The assessment of outcome is made blind to exposure status                                                                                |  |
| Where blinding was not possible, there is some recognition that knowledge of exposure status could have influenced the outcome assessment |  |
| Exposure status is measured in a standard, valid and reliable way                                                                         |  |
| The measurement of outcome is clearly described (e.g., written questionnaire, face-to-face interview, internet survey)                    |  |
| The main potential confounders are identified and taken into account in the design and analysis                                           |  |
| Comparison is made between participants and non-participants to establish their similarities/ differences                                 |  |
| Confidence intervals are provided                                                                                                         |  |
| If study is carried out at more than one site, results are comparable for all site                                                        |  |
| <b>Overall assessment of the study</b>                                                                                                    |  |
| How well was study done to minimize confounding/ bias, and to establish a causal relationship?                                            |  |
| If coded + or -, what is the likely direction in which bias might affect the study results?                                               |  |
| Was the likelihood of bias due to measuring exposure and outcome at the same moment, taken into account by the authors?                   |  |
| Are you certain that the overall effect is due to the exposure being investigated?                                                        |  |
| Are the results of the study applicable to the patient group targeted in the search question?                                             |  |
|                                                                                                                                           |  |
| <b>Comments</b>                                                                                                                           |  |
|                                                                                                                                           |  |
| <b>Include or exclude</b>                                                                                                                 |  |
|                                                                                                                                           |  |
| <b>If exclusion, give reason</b>                                                                                                          |  |

### Surveillance study

Code as -- / - / + - / + / ++ or NA if not applicable

|                                                                                                                                      |  |
|--------------------------------------------------------------------------------------------------------------------------------------|--|
| <b>Author</b>                                                                                                                        |  |
| <b>Countries</b>                                                                                                                     |  |
|                                                                                                                                      |  |
| <b>Internal validity</b>                                                                                                             |  |
| The study addresses an appropriate and clearly focused question                                                                      |  |
| The population being studied is selected from a data source that is representative for the overall population of interest            |  |
| The outcomes are clearly defined                                                                                                     |  |
| The main potential confounders are identified and taken into account in the design and analysis                                      |  |
|                                                                                                                                      |  |
| <b>Additional questions</b>                                                                                                          |  |
| Are epidemiological outcomes described that can be used in this review, e.g. incidences or rates per 100,000 or proportion of cases? |  |
| Is the study population large enough to be a representative sample of the source population?                                         |  |
| Is the disease of interest the main subject of the paper?                                                                            |  |
| Are the outcomes of the study based on observed cases (and not on assumptions or models?)                                            |  |
| The surveillance period is long enough to detect new cases and to accurately calculate prevalence/ incidence rates                   |  |
|                                                                                                                                      |  |
| <b>Overall assessment of the study</b>                                                                                               |  |
| Are the results valid?                                                                                                               |  |
| Are the results applicable to the population targeted in the search question?                                                        |  |
|                                                                                                                                      |  |
| <b>Comments</b>                                                                                                                      |  |
|                                                                                                                                      |  |
| <b>Include or exclude</b>                                                                                                            |  |
|                                                                                                                                      |  |
| <b>If exclusion, give reason</b>                                                                                                     |  |

**Other research (applied to outbreak studies)**

Code as - - / - / + - / + / ++ or NA if not applicable

|                                                                   |  |
|-------------------------------------------------------------------|--|
| <b>Author</b>                                                     |  |
| <b>Countries</b>                                                  |  |
|                                                                   |  |
| <b>Internal validity</b>                                          |  |
| The study addresses an appropriate and clearly focused question   |  |
| The study population is clearly described                         |  |
| The population is representative of the source population         |  |
| Exposure status is measured in a standard, valid and reliable way |  |

|                                                                               |  |
|-------------------------------------------------------------------------------|--|
| The outcomes are clearly defined                                              |  |
| Variation (e.g. range, SD) in outcome of interest is provided                 |  |
| The diagnosis of interest the main subject of the paper                       |  |
|                                                                               |  |
| <b>Overall assessment of the study</b>                                        |  |
| Are the results valid?                                                        |  |
| Are the results applicable to the population targeted in the search question? |  |
|                                                                               |  |
| <b>Comments</b>                                                               |  |
|                                                                               |  |
| <b>Include or exclude</b>                                                     |  |
|                                                                               |  |
| <b>If exclusion, give reason</b>                                              |  |

## Web Appendix 4. Grey literature search

### *Search on pre-defined websites*

#### **Websites of conference abstracts**

In order to capture studies not published yet in peer-reviewed literature, conference abstracts published in the last five years (i.e. from 2010 onwards) were searched for on all the following websites of relevant congresses:

- International Union for Tuberculosis and Lung Disease (<http://www.theunion.org/> )
- European Respiratory Society (<http://www.ersnet.org/>)
- American Respiratory Society (<https://www.thoracic.org/>)
- International Corrections and Prisons Association (ICPA, <http://icpa.ca/>)
- American Correctional Association ([http://www.aca.org/aca\\_prod\\_imis/aca\\_member](http://www.aca.org/aca_prod_imis/aca_member))
- Experiencing Prison 7<sup>th</sup> Global Conference (<http://www.inter-disciplinary.net/probing-the-boundaries/persons/experiencing-prison/>)
- National Conference on Correctional Health Care (<http://www.ncchc.org/national-conference>)

#### **Other websites**

The following sources were searched for other grey literature documents published in the last ten years (i.e. from 2005 onwards):

- Organisations and institutes:
  - WHO – Health in prisons programme (HIPP) (<http://www.euro.who.int/prisons>)
  - WHO – EU (<http://www.euro.who.int/en/home>)
  - WHO – IRIS (<http://apps.who.int/iris/>)
  - Council of Europe/POMPIDOU Group ([http://www.coe.int/T/DG3/Pompidou/AboutUs/default\\_en.asp](http://www.coe.int/T/DG3/Pompidou/AboutUs/default_en.asp)), and other Council of Europe documents
  - UNODC (<http://www.unodc.org/>)

- ECDC (<http://ecdc.europa.eu/en/Pages/home.aspx>)
- Public Health England (PHE) – (<http://www.gov.uk>)
- European Monitoring Centre for Drugs and Drug Addiction (EMCDDA) (<http://www.emcdda.europa.eu/>)
- International Corrections and Prisons Association (ICPA, <http://icpa.ca/>)
- Bibliographies
  - Campbell Collaboration (<http://www.campbellcollaboration.org/>)
  - Bibliography on HIV/AIDS and Hepatitis C in prisons (<http://www.aidslaw.ca/>)
  - IDEAS (<https://ideas.repec.org/>)
  - Evidence in Health and Social Care (NHS Evidence, <https://www.evidence.nhs.uk/>)
  - Open grey (<http://www.opengrey.eu> )

### ***Inclusion and exclusion criteria***

**Web Table 3. Inclusion and exclusion criteria grey literature**

|                               | <b>Inclusion</b>                                                                                                                                                                                                                                                             | <b>Exclusion</b>                                                                                                                                       |
|-------------------------------|------------------------------------------------------------------------------------------------------------------------------------------------------------------------------------------------------------------------------------------------------------------------------|--------------------------------------------------------------------------------------------------------------------------------------------------------|
| Period of publication         | Conference abstracts: from 2005 onwards<br>Other documents: from 2010 onwards                                                                                                                                                                                                |                                                                                                                                                        |
| Type of document              | <ul style="list-style-type: none"> <li>● Intervention or clinical protocols</li> <li>● Unpublished research results</li> <li>● Case studies/service models, including measures of effectiveness</li> </ul>                                                                   | <ul style="list-style-type: none"> <li>● Published article</li> </ul>                                                                                  |
| Document quality              | Only grey literature documents with a methods section or an overview of sources.                                                                                                                                                                                             | Document without a clear source/reference for the relevant information                                                                                 |
| Document population           | Adults in prisons, jails and other custodial settings that function as a prison <ul style="list-style-type: none"> <li>● Detained persons, including persons in remand</li> <li>● Persons "going through the gate" (e.g. prison guards, healthcare workers, etc.)</li> </ul> | <ul style="list-style-type: none"> <li>● Children (&lt;18 years)</li> <li>● Persons in police custody</li> <li>● Persons in migrant centres</li> </ul> |
| Subject of the document       | <ul style="list-style-type: none"> <li>● Active case finding for communicable diseases at entrance and during prison stay</li> <li>●</li> </ul>                                                                                                                              |                                                                                                                                                        |
| Geographical area             | <ul style="list-style-type: none"> <li>● EU/EEA</li> </ul>                                                                                                                                                                                                                   |                                                                                                                                                        |
| Specific outcomes of interest | <ul style="list-style-type: none"> <li>● Quantitative outcomes</li> <li>● Qualitative outcomes</li> </ul>                                                                                                                                                                    | <ul style="list-style-type: none"> <li>● No exclusion based on outcomes</li> </ul>                                                                     |

### **Web Appendix 5. Quality control**

During the review process, the following quality control measures were put in place for search and selection of peer-reviewed literature:

- Peer-review of the search strings by ECDC librarians and expert panel members.
- Selection based on title and abstract was performed by two independent researchers. All hits that could be excluded for clear reasons (based on the inclusion/exclusion criteria) were excluded. When in doubt, the title and abstract were assessed in duplicate and discussed. All references included by these two researchers (including the remaining doubt articles) were checked by another researcher with expertise in the field of prison health, who took the final decision on the articles in doubt.
- Duplicate screening and critical appraisal of 50% of the full text articles was performed by two independent reviewers to avoid incorrect selection of articles for data extraction. The

results were compared and discussed early in the review process and any disagreements were adjudicated by a third reviewer if necessary. Any doubts arising during the screening of the remainder of the full text articles were discussed in the project team.

- Evidence tables were compiled by two researchers (not in duplicate) and all evidence tables were reviewed by an independent researcher.

The following quality control measures were put in place for search and selection of grey literature:

- Evidence tables were compiled by a researcher and reviewed by a second researcher of the project.
- A senior researcher also checked a sample of 10% of the included articles in the evidence tables early in the process to allow for refinement of data extraction.



## Web Appendix 6.

Web Table 4: Included records on active case finding for HAV

| Reference, country, study design                | Prison setting, sample                                                                  | Testing method, offer                              | Who, when, promotion                                                                                                                          | Uptake | Positivity rate | Change in number or % tested | Change prevalence /incidence | Other | Treatment initiation | Level of evidence |
|-------------------------------------------------|-----------------------------------------------------------------------------------------|----------------------------------------------------|-----------------------------------------------------------------------------------------------------------------------------------------------|--------|-----------------|------------------------------|------------------------------|-------|----------------------|-------------------|
| <b>At release</b>                               |                                                                                         |                                                    |                                                                                                                                               |        |                 |                              |                              |       |                      |                   |
| Sieck, 2011 [1]<br>USA<br>Cross-sectional study | A male prison housing minimum, medium, close, and maximum security inmates<br><br>n=916 | Blood test, not further specified<br><br>Mandatory | All inmates scheduled for release<br><br>At release (4-6 weeks before the scheduled release day)<br><br>Letter describing STD testing process | NA     | 0.0%            | NR                           | NR                           | NR    | NR                   | Very low          |

NA=not applicable, NR=not reported, STD=sexually transmitted disease, USA=United States of America

Web Table 5: Included records on active case finding for HBV

| Reference, country, study design                                                      | Prison setting, sample                                          | Testing method, offer                                                                | Who, when, promotion                                                                       | Uptake | Positivity rate                     | Change in number or % tested | Change prevalence /incidence | Other | Treatment initiation | Level of evidence     |
|---------------------------------------------------------------------------------------|-----------------------------------------------------------------|--------------------------------------------------------------------------------------|--------------------------------------------------------------------------------------------|--------|-------------------------------------|------------------------------|------------------------------|-------|----------------------|-----------------------|
| <b>At entry</b>                                                                       |                                                                 |                                                                                      |                                                                                            |        |                                     |                              |                              |       |                      |                       |
| Jacomet, 2016 [2]<br>France<br>Cross-sectional study                                  | Two prisons<br><br>n=702                                        | ELISA<br><br>Opt-in                                                                  | Adult inmates<br><br>At entry (timing NR)<br><br>Posters, personalised information letters | 91.3%  | 0.6%<br>0.3% newly diagnosed        | NR                           | NR                           | NR    | NR                   | Very low              |
| Watkins, 2009 (included in review Rumble, 2015 [3])<br>Australia<br>Descriptive study | Western Australian prisons (not further specified)<br><br>n=946 | Standard routine BBV testing with venous blood sampling: HIV, HBV, HCV<br><br>Opt-in | Male and female inmates<br><br>At entry (within 28 days)<br><br>NR                         | NR     | 4.5% (95% CI 1.2-2.1%) <sup>1</sup> | NR                           | NR                           | NR    | NR                   | Very low <sup>2</sup> |

|                                                                  |                                                                                                                                                                             |                                                           |                                                                                                                                               |       |                                                                                                        |                                                                                                              |    |    |    |                      |
|------------------------------------------------------------------|-----------------------------------------------------------------------------------------------------------------------------------------------------------------------------|-----------------------------------------------------------|-----------------------------------------------------------------------------------------------------------------------------------------------|-------|--------------------------------------------------------------------------------------------------------|--------------------------------------------------------------------------------------------------------------|----|----|----|----------------------|
| Gabbuti A 2015 [4]<br>Italy<br>Series of cross-sectional studies | Regional prison, Florence (Italy)<br><br>Prisoners:<br>-2009<br>N=2,303<br>-2010<br>N=2,376<br>-2011<br>N=2,198<br>-2012<br>N=2,015<br>-2013<br>N=1,843<br>-2014<br>N=1,408 | HBV serology<br><br>Opt-in                                | All prisoners<br><br>At entry<br><br>NR                                                                                                       | >95%  | -16.5 % in 2009<br>-15.7% in 2010<br>-11.7% in 2011<br>-8.0% in 2012<br>-6.9% in 2013<br>-8.1% in 2014 | NR                                                                                                           | NR | NR | NR | Unpublished research |
| Foschi A 2015 [5]<br>Italy<br>Cross-sectional study              | Single prison in Italy (Opera prison, Milan)<br><br>N=711                                                                                                                   | HBV serology<br><br>Opt-in                                | All prisoners<br><br>At entry<br><br>NR                                                                                                       | 91.5% | 31/468 (6.6%)                                                                                          | NR                                                                                                           | NR | NR | NR | Conference abstract  |
| <b>During imprisonment</b>                                       |                                                                                                                                                                             |                                                           |                                                                                                                                               |       |                                                                                                        |                                                                                                              |    |    |    |                      |
| Sagnelli, 2012 [6]<br>Italy<br>Cross-sectional study             | Six penitentiaries<br><br>n=3,468                                                                                                                                           | Analogous commercial immune enzymatic assay<br><br>Opt-in | All inmates<br><br>During imprisonment<br><br>Presentation on advantages of screening by peer-educators, pamphlets on importance of screening | 65.3% | 4.4%                                                                                                   | Higher uptake than in the nine correctional facilities evaluated in this study before peer-education (10.0%) | NR | NR | NR | Very low             |
| Bedoya A 2014 [7]<br>Spain<br>Retrospective study                | Single prison in Barcelona (Spain)<br><br>N=7,767                                                                                                                           | HBV serology<br><br>Opt-in                                | All prisoners from 1987 to 2013<br><br>During imprisonment<br><br>NR                                                                          | NR    | 13.2%                                                                                                  | NR                                                                                                           | NR | NR | NR | Conference abstract  |
| Babudieri S 2015 [8]                                             | 4 prisons in Italy                                                                                                                                                          | HBV serology                                              | All prisoners                                                                                                                                 | 83.8% | 104/2233 (4.7%)                                                                                        | NR                                                                                                           | NR | NR | NR | Conference abstract  |

|                                   |                                                                            |                                   |                                                         |       |      |                     |    |    |    |                     |
|-----------------------------------|----------------------------------------------------------------------------|-----------------------------------|---------------------------------------------------------|-------|------|---------------------|----|----|----|---------------------|
| Italy                             | N=2,233                                                                    | Opt-in                            | During imprisonment                                     |       |      |                     |    |    |    |                     |
| Cross-sectional study             |                                                                            |                                   | NR                                                      |       |      |                     |    |    |    |                     |
| Babudieri S 2012 [9]              | 20 Italian prisons                                                         | HBV serology                      | All prisoners                                           | 56.3% | 5.3% | From 10.0% to 42.9% | NR | NR | NR | Conference abstract |
| Italy                             | N=4,072                                                                    | Opt-in                            | During imprisonment                                     |       |      |                     |    |    |    |                     |
| Series of cross-sectional studies |                                                                            |                                   | Peer educators, leaflets, posters and staff training    |       |      |                     |    |    |    |                     |
| <b>At release</b>                 |                                                                            |                                   |                                                         |       |      |                     |    |    |    |                     |
| Sieck, 2011 [1]                   | A male prison housing minimum, medium, close, and maximum security inmates | Blood test, not further specified | All inmates scheduled for release                       | NA    | 0.5% | NR                  | NR | NR | NR | Very low            |
| USA                               | n=916                                                                      | Mandatory                         | At release (4-6 weeks before the scheduled release day) |       |      |                     |    |    |    |                     |
| Cross-sectional study             |                                                                            |                                   | Letter describing STD testing process                   |       |      |                     |    |    |    |                     |

BBV=blood-borne virus, CI=confidence interval, ELISA=enzyme-linked immunosorbent assay, HBV=hepatitis B virus, HCV=hepatitis C virus, HIV=human immunodeficiency virus, NA=not applicable, NR=not reported, RR=relative risk, STD=sexually transmitted disease, USA=United States of America

<sup>1</sup> As reported in Rumble et al., 2015 (and in the original article). Positivity rate is not included in the 95% CI

<sup>2</sup> This article was included in the review of Rumble et al., 2015, which has a very low level of evidence

**Web Table 6: Included records on active case finding for HCV**

| Reference, country, study design | Prison setting, sample | Testing method, offer | Who, when, promotion                      | Uptake | Positivity rate      | Change in number or % tested | Change prevalence /incidence | Other | Treatment initiation | Level of evidence |
|----------------------------------|------------------------|-----------------------|-------------------------------------------|--------|----------------------|------------------------------|------------------------------|-------|----------------------|-------------------|
| <b>At entry</b>                  |                        |                       |                                           |        |                      |                              |                              |       |                      |                   |
| Jacomet, 2016 [2]                | Two prisons            | ELISA                 | Adult inmates                             | 89.9%  | 4.7%                 | NR                           | NR                           | NR    | NR                   | Very low          |
| France                           | n=702                  | Opt-in                | At entry (timing NR)                      |        | 2.0% newly diagnosed |                              |                              |       |                      |                   |
| Cross-sectional study            |                        |                       | Posters, personalised information letters |        |                      |                              |                              |       |                      |                   |

|                                                                                                  |                                                                                                    |                                                                                                                                  |                                                                                                                                    |     |                                                                                          |    |    |                                                                                                                                |    |                       |
|--------------------------------------------------------------------------------------------------|----------------------------------------------------------------------------------------------------|----------------------------------------------------------------------------------------------------------------------------------|------------------------------------------------------------------------------------------------------------------------------------|-----|------------------------------------------------------------------------------------------|----|----|--------------------------------------------------------------------------------------------------------------------------------|----|-----------------------|
| Horne, 2004<br>(included in review Rumble, 2015 [3])<br><br>UK<br><br>Descriptive study          | Dartmoor Prison, UK<br><br>n=3,034                                                                 | Standard routine BBV testing with venous blood sampling: HCV (HCV antibody testing and confirmatory PCR)<br><br>Opt-in           | Male inmates<br><br>At entry (timing NR)<br><br>NR                                                                                 | 12% | 12.0%                                                                                    | NR | NR | NR                                                                                                                             | NR | Very low <sup>1</sup> |
| Skipper, 2003<br>(included in review Rumble, 2015 [3])<br><br>UK<br><br>Descriptive study        | Isle of Wight (not further specified)<br><br>n=1,618                                               | Standard routine BBV testing with venous blood sampling: HIV, HBV, HCV (HCV antibody testing and confirmatory PCR)<br><br>Opt-in | Inmates<br><br>At entry (timing NR)<br><br>NR                                                                                      | 9%  | 29.9%                                                                                    | NR | NR | NR                                                                                                                             | NR | Very low <sup>1</sup> |
| Kuncio, 2015 [10]<br><br>USA<br><br>Cross-sectional study                                        | 6 jails and special detention sites (awaiting trial or serving sentences ≤2 years)<br><br>n=51,562 | NR<br><br>NR                                                                                                                     | High-risk inmates (HIV-infected or self-reported IDU, identified during medical examination)<br><br>At entry (timing NR)<br><br>NR | NR  | 57% of high-risk inmates** (serosurvey among all entrants during an 8-day period: 11.9%) | NR | NR | Risk-based active case finding failed to capture 4,877, or 76% of the predicted HCV-positive inmates incarcerated in 2011-2012 | NR | Very low              |
| Watkins, 2009<br>(included in review Rumble, 2015 [3])<br><br>Australia<br><br>Descriptive study | Western Australian prisons (not further specified)<br><br>n=946                                    | Standard routine BBV testing with venous blood sampling: HIV, HBV, HCV<br><br>Opt-in                                             | Male and female inmates<br><br>On entry (within 28 days)<br><br>NR                                                                 | NR  | 24.8% (95% CI 20.2-29.5%)                                                                | NR | NR | NR                                                                                                                             | NR | Very low <sup>1</sup> |

|                                                                   |                                                                                                                       |                                                                              |                                                                                                                                               |                                                                                                                  |                                                                                                                                                                                                                           |                                                                                                                  |    |    |                                                                  |                      |
|-------------------------------------------------------------------|-----------------------------------------------------------------------------------------------------------------------|------------------------------------------------------------------------------|-----------------------------------------------------------------------------------------------------------------------------------------------|------------------------------------------------------------------------------------------------------------------|---------------------------------------------------------------------------------------------------------------------------------------------------------------------------------------------------------------------------|------------------------------------------------------------------------------------------------------------------|----|----|------------------------------------------------------------------|----------------------|
| Gabbuti A 2015 [11]<br>Italy<br>Series of cross-sectional studies | Regional prison, Florence (Italy)<br><br>-N=2,376 in 2010<br>-N=2,198 in 2011<br>-N=2,015 in 2012<br>-N=1,843 in 2013 | HCV serology + HCV-RNA in those HCV ab positive<br><br>Opt-in                | All prisoners<br><br>At entry<br><br>NR                                                                                                       | -395/1667 (23.7%) in 2010<br>-419/1617 (25.9%) in 2011<br>-905/1472 (61.4%) in 2012<br>-960/1166 (82.3%) in 2013 | - 281/395 (71.1%) in 2010 with 228 (81.1%) HCV-RNA +<br>- 308/419 (73.5%) in 2011 with 257 (83.4%) HCV-RNA+<br>- 393/905 (43.4%) in 2012 with 329 (83.7%) HCV-RNA+<br>- 274/970 (28.2%) in 2013 with 219 (79.9%) HCV-RNA+ | NR                                                                                                               | NR | NR | NR                                                               | Unpublished research |
| Foschi A 2015 [5]<br>Italy<br>Cross-sectional study               | Single prison in Italy (Opera prison, Milan)<br><br>N=711                                                             | HCV serology + HCV-RNA in those HCV ab positive<br><br>Opt-in                | All prisoners<br><br>At entry<br><br>NR                                                                                                       | 91.5%                                                                                                            | 46/468 (9.8%)<br><br>HCV RNA positive: 38/46 (83%)                                                                                                                                                                        | NR                                                                                                               | NR | NR | NR                                                               | Conference abstract  |
| <b>During imprisonment</b>                                        |                                                                                                                       |                                                                              |                                                                                                                                               |                                                                                                                  |                                                                                                                                                                                                                           |                                                                                                                  |    |    |                                                                  |                      |
| Sagnelli, 2012 [6]<br>Italy<br>Cross-sectional study              | Six penitentiaries<br><br>n=3,468                                                                                     | Analogous commercial immune enzymatic assay<br><br>Opt-in                    | All inmates<br><br>During imprisonment<br><br>Presentation on advantages of screening by peer-educators, pamphlets on importance of screening | 64.6%                                                                                                            | 22.8%                                                                                                                                                                                                                     | Higher acceptance than in the nine correctional facilities evaluated in this study before peer-education (20.5%) | NR | NR | NR                                                               | Very low             |
| Beckwith, 2015 [12]<br>USA<br>Cross-sectional study               | Minimum security facility, women's facility and the intake service centre                                             | OraQuick HCV Rapid Antibody Test (blood specimen); confirmation with HCV RNA | Inmates selected by the research staff<br><br>During imprisonment                                                                             | 26% reactive rapid HCV test<br><br>92% of HCV+ testers underwent                                                 | 10% reactive HCV test<br><br>6% confirmed hepatitis C                                                                                                                                                                     | NR                                                                                                               | NR | NR | 26.7% of confirmed HCV inmates were linked to care after release | Very low             |

|                                                                    |                                                                                       |                                                |                                                                                                                                                                                                                                     |                      |       |                     |    |    |    |                     |
|--------------------------------------------------------------------|---------------------------------------------------------------------------------------|------------------------------------------------|-------------------------------------------------------------------------------------------------------------------------------------------------------------------------------------------------------------------------------------|----------------------|-------|---------------------|----|----|----|---------------------|
|                                                                    | n=957                                                                                 | plasma viral load testing<br>Opt-in            | 8-minute informational video, post-test counselling appointment reminder card                                                                                                                                                       | confirmatory testing |       |                     |    |    |    |                     |
| Babudieri S 2015 [8]<br>Italy<br>Cross-sectional study             | 4 prisons in Italy<br>N=2,233                                                         | HCV serology<br>Opt-in                         | All prisoners<br>During imprisonment<br>NR                                                                                                                                                                                          | 83.8%                | 17.6% | NR                  | NR | NR | NR | Conference abstract |
| Babudieri S 2012 [9]<br>Italy<br>Series of cross-sectional studies | 20 Italian prisons<br>N=4,072                                                         | HCV serology<br>Opt-in                         | All prisoners<br>During imprisonment<br>Testing promotion based on peer educators, leaflets, posters and staff training                                                                                                             | 56.3%                | 32.8% | From 20.5% to 42.0% | NR | NR | NR | Conference abstract |
| <b>At entry and during imprisonment</b>                            |                                                                                       |                                                |                                                                                                                                                                                                                                     |                      |       |                     |    |    |    |                     |
| Cocoros, 2014 [13]<br>USA<br>Cross-sectional study                 | A county facility, for those awaiting trial and those sentenced <2.5 years<br>n=2,716 | Immunoassay testing<br>Opt-in                  | All inmates<br>At entry (within few days) & during imprisonment when not tested at entry (during regular "sick call")<br>Mandatory education session on hepatitis before choice to be tested, referral upon release if HCV positive | 21.9%                | 20.5% | NR                  | NR | NR | NR | Very low            |
| <b>At release</b>                                                  |                                                                                       |                                                |                                                                                                                                                                                                                                     |                      |       |                     |    |    |    |                     |
| Sieck, 2011 [1]<br>USA<br>Cross-sectional study                    | A male prison housing minimum, medium, close, and maximum security inmates            | Blood test, not further specified<br>Mandatory | All inmates scheduled for release<br>At release (4-6 weeks before the                                                                                                                                                               | NA                   | 1.7%  | NR                  | NR | NR | NR | Very low            |

|                                                     |                                                                                                        |                                                                     |                                                                                                                                                                                                                                                            |                                                    |                                                                             |                                                                                      |                                                                                              |                                                                                                                                                               |    |          |
|-----------------------------------------------------|--------------------------------------------------------------------------------------------------------|---------------------------------------------------------------------|------------------------------------------------------------------------------------------------------------------------------------------------------------------------------------------------------------------------------------------------------------|----------------------------------------------------|-----------------------------------------------------------------------------|--------------------------------------------------------------------------------------|----------------------------------------------------------------------------------------------|---------------------------------------------------------------------------------------------------------------------------------------------------------------|----|----------|
|                                                     | n=916                                                                                                  |                                                                     | scheduled release day)<br><br>Letter describing STD testing process                                                                                                                                                                                        |                                                    |                                                                             |                                                                                      |                                                                                              |                                                                                                                                                               |    |          |
| <b>Opt-in at entry versus client-initiated</b>      |                                                                                                        |                                                                     |                                                                                                                                                                                                                                                            |                                                    |                                                                             |                                                                                      |                                                                                              |                                                                                                                                                               |    |          |
| Kim, 2013 [14]<br><br>USA<br><br>Before-after study | Two facilities of the correctional institute (one for male and one for female inmates)<br><br>n=12,297 | NR<br><br>Opt-in                                                    | <b>Risk-based:</b><br>High-risk inmates (risk assessment based on dynamic model of virological parameters)<br><br>At entry (risk assessment within 7 days of admission, timing test NR)<br><br>Staff educational seminar on benefits identifying acute HCV | 80.7% of high risk inmates had laboratory testing* | 25.4% of high risk inmates with laboratory testing had positive test result | NR                                                                                   | Historical control period: 0.7 cases/month; risk-based active case finding: 1.94 cases/month | Acute cases identified through active case finding twice as likely to be asymptomatic (48.6%) compared with historical control period (33.3%, RR 2.0; p=0.09) | NR | Very low |
|                                                     |                                                                                                        | NR<br><br>Client-initiated                                          | <b>Historical control:</b><br>All inmates<br><br>When having hepatitis symptoms or significant ALT elevations<br><br>Staff educational seminars on acute HCV                                                                                               | NR                                                 | NR                                                                          | NR                                                                                   |                                                                                              |                                                                                                                                                               |    |          |
| <b>At entry versus client-initiated</b>             |                                                                                                        |                                                                     |                                                                                                                                                                                                                                                            |                                                    |                                                                             |                                                                                      |                                                                                              |                                                                                                                                                               |    |          |
| Craine, 2015 [15]<br><br>UK                         | Five prisons; 1 female closed local prison, 2 male local adult remand                                  | <b>Intervention:</b><br>DBST, detection of HCV antibodies<br><br>NR | All eligible inmates<br><br>At entry (timing NR)<br><br>Pre- and post-test counselling                                                                                                                                                                     | NR                                                 | NR                                                                          | <i>At 18 months:</i><br>Higher HCV test rates during intervention months (data only) | NR                                                                                           | NR                                                                                                                                                            | NR | Low      |

|                                                                        |                                                                                   |                                                                                                                |                                                                                                                                                                                                                |       |            |                                                                                                                                                                                                                   |    |    |    |          |
|------------------------------------------------------------------------|-----------------------------------------------------------------------------------|----------------------------------------------------------------------------------------------------------------|----------------------------------------------------------------------------------------------------------------------------------------------------------------------------------------------------------------|-------|------------|-------------------------------------------------------------------------------------------------------------------------------------------------------------------------------------------------------------------|----|----|----|----------|
| Stepped-wedge cluster-RCT                                              | prisons; 1 male convicted prison (adults & youth); 1 male open prison<br>n=~3,600 | <b>Control:</b><br>Venepuncture<br><br>Only female prison offered routine HCV testing, other prisons NR        | All eligible inmates<br><br>NR<br><br>NR                                                                                                                                                                       |       |            | stratified presented)<br><br>Insufficient evidence of effect of the intervention:<br>- ITT:<br>OR=0.84;<br>95% CI: 0.68-1.03; p=0.088<br>- Actual intervention time:<br>OR= 0.86;<br>95% CI: 0.71 - 1.06; p=0.153 |    |    |    |          |
| <b>Not specified versus client-initiated</b>                           |                                                                                   |                                                                                                                |                                                                                                                                                                                                                |       |            |                                                                                                                                                                                                                   |    |    |    |          |
| Hickman, 2008 [16]<br><br>UK<br><br>Cluster RCT                        | 6 prisons throughout England and Wales<br><br>NR                                  | <b>Intervention:</b><br>DBST<br><br>NR<br><br><b>Control:</b><br>NR (regular practice)<br><br>Client-initiated | Inmates, not further specified<br><br>NR<br><br>Staff training on counselling, pre- and post-test counselling<br><br>Inmates, not further specified<br><br>On request or at selected times each week<br><br>NR | NR    | NR         | <i>Mean % HCV tested after 6 months follow-up:</i><br>50% increase in one prison pair, 10% increase in other two prison pairs                                                                                     | NR | NR | NR | Moderate |
| <b>Not specified</b>                                                   |                                                                                   |                                                                                                                |                                                                                                                                                                                                                |       |            |                                                                                                                                                                                                                   |    |    |    |          |
| Khaw, 2007 [17]<br><br>UK<br><br>Cross-sectional and qualitative study | 3 prisons in England<br><br>n=30                                                  | NR<br><br>NR                                                                                                   | Inmates, not further specified<br><br>NR<br><br>Information sheets about study, no reimbursements/ inducements                                                                                                 | 63.3% | 36.8% HCV+ | NR                                                                                                                                                                                                                | NR | NR | NR | Very low |



ALT=alanine aminotransferase, BBV=blood-borne virus, CI=confidence interval, DBST=dried blood spot testing, ELISA=enzyme-linked immunosorbent assay, HBV=hepatitis B virus, HCV=hepatitis C virus, HIV=human immunodeficiency virus, , ITT=intention to treat, NR=not reported, OR=odds ratio, RCT=randomised controlled trial, RNA=ribonucleic acid, RR=relative risk, USA=United States of America

<sup>1</sup> This article was included in the review of Rumble et al., 2015, which has a very low level of evidence

\*28.2% of admitted inmates were screened for risk factors, 4.9% were high risk inmates

\*\*5.3% of admitted inmates were high risk inmates

**Web Table 7: Included records on active case finding for HIV**

| Reference, country, study design                     | Prison setting, sample                                                                      | Testing method, offer                                                                | Who, when, promotion                                                                                                                                                                                    | Uptake                                             | Positivity rate                                           | Change in number or % tested | Change prevalence /incidence | Other                                                                                                      | Treatment initiation | Level of evidence |
|------------------------------------------------------|---------------------------------------------------------------------------------------------|--------------------------------------------------------------------------------------|---------------------------------------------------------------------------------------------------------------------------------------------------------------------------------------------------------|----------------------------------------------------|-----------------------------------------------------------|------------------------------|------------------------------|------------------------------------------------------------------------------------------------------------|----------------------|-------------------|
| <b>At entry</b>                                      |                                                                                             |                                                                                      |                                                                                                                                                                                                         |                                                    |                                                           |                              |                              |                                                                                                            |                      |                   |
| Spaulding, 2015 [18]<br>USA<br>Cross-sectional study | One county jail<br>n=30,799                                                                 | Rapid HIV test (oral), Western blot confirmatory test (venous blood)<br><br>Opt-in   | Adult newly incarcerated inmates, except HIV positive and mentally incompetent inmates<br><br>At entry (immediately after booking, timing NR)<br><br>Pre- and post-test counselling                     | 38.4%                                              | 1.1% preliminary positive<br>0.3% confirmed new HIV cases | NR                           | NR                           | NR                                                                                                         | NR                   | Very low          |
| Tartaro, 2013 [19]<br>USA<br>Cross-sectional study   | One county jail<br>n=NR (n=689 inmates tested)                                              | Free rapid fingerprick HIV test, confirmatory blood test not specified<br><br>Opt-in | Newly incarcerated inmates<br><br>At entry (give consent within 24-72 hours, test mostly 1-3 days after consent)<br><br>Group-based HIV education while waiting for test results, post-test counselling | 50% consent<br>56% tested of those giving consent* | 0.3% HIV positive<br>0.1% newly HIV diagnosed             | NR                           | NR                           | NR                                                                                                         | NR                   | Very low          |
| Begier, 2010 [20]<br>USA<br>Cross-sectional study    | Eleven New York City jails<br><br>n=9,405 new admissions with available medical intake data | Bio-Rad HIV-1/HIV-2 EIA plus "O", Western Blot confirmatory test<br><br>Opt-in       | Newly incarcerated inmates<br><br>At entry (timing NR)<br><br>NR                                                                                                                                        | NR                                                 | NR                                                        | NR                           | NR                           | Based on a blinded serosurvey, n~743 (95% CI 552-934) of the n~ 820 (95% CI 619-1021) annual entrants with | NR                   | Very low          |

|                                                                                               |                                                                                            |                                                                                                                                 |                                                                                                                                                                                                                            |                                                                  |                                                                                                  |                                                                                   |    |                                                                                |    |                       |
|-----------------------------------------------------------------------------------------------|--------------------------------------------------------------------------------------------|---------------------------------------------------------------------------------------------------------------------------------|----------------------------------------------------------------------------------------------------------------------------------------------------------------------------------------------------------------------------|------------------------------------------------------------------|--------------------------------------------------------------------------------------------------|-----------------------------------------------------------------------------------|----|--------------------------------------------------------------------------------|----|-----------------------|
|                                                                                               |                                                                                            |                                                                                                                                 |                                                                                                                                                                                                                            |                                                                  |                                                                                                  |                                                                                   |    | undiagnosed HIV remain undiagnosed                                             |    |                       |
| MacGowan, 2009 [21]<br><br>USA<br><br>Cross-sectional study                                   | Jails in four states<br><br>n=550,000                                                      | Rapid HIV tests, confirmatory testing using EIA followed by Western blot or immunofluorescent assay (blood/ oral)<br><br>Opt-in | Newly incarcerated inmates<br><br>At entry (after 24 hours, in one jail after 72 hours, maximum timing NR)<br><br>Advertising of rapid HIV tests, pre-test counselling, active follow-up and referral for positive testers | 6% rapid test<br>96% confirmatory test of positive rapid testers | 1.3% positive rapid test<br>1.2% confirmed HIV positive<br>0.8% new HIV cases                    | NR                                                                                | NR | 99.9% received test result                                                     | NR | Very low              |
| Shrestha, 2009 [22]<br><br>USA<br><br>Cross-sectional study                                   | Jail facilities in four USA states<br><br>n=NR (n=17,433 inmates tested)                   | OraQuick rapid HIV test<br><br>Opt-in                                                                                           | Jail inmates<br><br>At entry (timing NR)<br><br>Counselling, not further specified, and active referral of positive testers                                                                                                | NR                                                               | <i>Range four jails:</i> 0.3-2.4% preliminary HIV positive<br>0.2-1.3% newly confirmed HIV cases | NR                                                                                | NR | NR                                                                             | NR | Very low              |
| Strick, 2011 (included in review Rumble, 2015 [3])<br><br>USA<br><br>Descriptive study        | Washington State Department of Corrections<br><br>- Opt-in: n=16,908<br>- Opt-out: n=5,168 | Standard routine BBV testing with venous blood sampling: HIV<br><br>Period of voluntary <sup>1</sup> , opt-in and opt-out       | Male inmates<br><br>At entry (within 14 days)<br><br>NR                                                                                                                                                                    | Opt-in: 72%                                                      | Opt-in: 0.1% (new)                                                                               | Increase from 5% (testing on request) to 72% (opt-in) to 90% acceptance (opt-out) | NR | 100% of HIV-positive inmates received test result, NR for HIV-negative inmates | NR | Very low <sup>3</sup> |
| Watkins, 2009 (included in review Rumble, 2015 [3])<br><br>Australia<br><br>Descriptive study | Australian prisons (not further specified)<br><br>n=946                                    | Standard routine BBV testing with venous blood sampling: HIV, HBV, HCV<br><br>Opt-in                                            | Male and female inmates<br><br>At entry (within 28 days)<br><br>NR                                                                                                                                                         | NR                                                               | 0.6% (95% CI 0.2-1.5%)                                                                           | NR                                                                                | NR | NR                                                                             | NR | Very low <sup>3</sup> |

|                                                                                                         |                                                                         |                                                                            |                                                               |                        |                                                                  |                                                                                    |    |                                                                              |    |                       |
|---------------------------------------------------------------------------------------------------------|-------------------------------------------------------------------------|----------------------------------------------------------------------------|---------------------------------------------------------------|------------------------|------------------------------------------------------------------|------------------------------------------------------------------------------------|----|------------------------------------------------------------------------------|----|-----------------------|
| Beckwith, 2007<br>(included in review Rumble, 2015 [3])<br><br>USA<br><br>Cross-sectional study         | Rhode Island Department of Corrections<br><br>n=100                     | Rapid routine BBV testing with dried blood spot test: HIV<br><br>Opt-in    | Male inmates<br><br>At entry (timing NR)<br><br>NR            | 95% <sup>2</sup>       | 0.0%                                                             | NR                                                                                 | NR | 100% received test result                                                    | NR | Very low <sup>3</sup> |
| Liddicoat, 2006<br>(included in review Rumble, 2015 [3])<br><br>USA<br><br>Before-after study           | County jail Boston, MA<br><br>n=2,886                                   | Standard routine BBV testing with venous blood sampling: HIV<br><br>Opt-in | Male and female inmates<br><br>At entry (timing NR)<br><br>NR | 73%                    | 0.3%                                                             | Increase from 18% to 73% compared to historical period when testing was on request | NR | NR                                                                           | NR | Very low <sup>3</sup> |
| Cotten-Oldenberg, 1999<br>(included in review Rumble, 2015 [3])<br><br>USA<br><br>Cross-sectional study | North Carolina Correctional Institution for Women<br><br>n=680          | Standard routine BBV testing with venous blood sampling: HIV<br><br>Opt-in | Female inmates<br><br>At entry (timing NR)<br><br>NR          | 71%                    | 2.5%                                                             | NR                                                                                 | NR | NR                                                                           | NR | Very low <sup>3</sup> |
| Behrendt, 1994<br>(included in review Rumble, 2015 [3])<br><br>USA<br><br>Cross-sectional study         | Maryland prison<br><br>n=2,791 (serosurvey: n=2,842)                    | Standard routine BBV testing with venous blood sampling: HIV<br><br>Opt-in | Male and female inmates<br><br>At entry (timing NR)<br><br>NR | 47%                    | 5.4% (serosurvey: 7.2%)                                          | NR                                                                                 | NR | Compared to the serosurvey, opt-in testing failed to detect 56% of HIV cases | NR | Very low <sup>3</sup> |
| Hoxie, 1990<br>(included in review Rumble, 2015 [3])<br><br>USA<br><br>Cross-sectional study            | Wisconsin (not further specified)<br><br>1987: n=1,783<br>1988: n=1,675 | Standard routine BBV testing with venous blood sampling: HIV<br><br>Opt-in | Male inmates<br><br>At entry (timing NR)<br><br>NR            | 1987: 40%<br>1988: 71% | 1987: 0.8% (95% CI 0.17-1.53%)<br>1988: 0.6% (95% CI 0.15-1.03%) | NR                                                                                 | NR | Compared to the serosurvey, opt-in testing failed to detect 28% of HIV cases | NR | Very low <sup>3</sup> |

|                                                                                               |                                                                                                                                      |                                                                                                                                                                     |                                                                  |                               |                                   |                                                                         |    |                                                                               |    |                       |
|-----------------------------------------------------------------------------------------------|--------------------------------------------------------------------------------------------------------------------------------------|---------------------------------------------------------------------------------------------------------------------------------------------------------------------|------------------------------------------------------------------|-------------------------------|-----------------------------------|-------------------------------------------------------------------------|----|-------------------------------------------------------------------------------|----|-----------------------|
| Andrus, 1989<br>(included in review Rumble, 2015 [3])<br><br>USA<br><br>Cross-sectional study | Oregon corrections system<br><br>n=977                                                                                               | Standard BBV testing with venous blood sampling: HIV, HBV (HBcAb was used only as surrogate marker for a history of risk behaviour for HIV infection)<br><br>Opt-in | Male and female inmates<br><br>At entry (timing NR)<br><br>NR    | 65%                           | 0.9%                              | NR                                                                      | NR | Compared to the sero-survey, opt-in testing failed to detect 50% of HIV cases | NR | Very low <sup>3</sup> |
| Spaulding, 2013<br>(included in review Rumble, 2015 [3])<br><br>USA<br><br>Descriptive study  | Fulton County Jail, Georgia<br><br>n=39,073                                                                                          | Rapid routine BBV testing with oral testing: HIV<br><br>Opt-out                                                                                                     | Male and female inmates<br><br>At entry (timing NR)<br><br>NR    | 64%                           | 0.4% (new)                        | Increase from 43% acceptance during opt-in testing to 64% under opt-out | NR | NR                                                                            | NR | Very low <sup>3</sup> |
| Beckwith, 2012<br>(included in review Rumble, 2015 [3])<br><br>USA<br><br>Descriptive study   | Baltimore (Ba), Philadelphia (Ph), District of Columbia (DC)<br><br>n=129,084:<br>- Ba: n=72,000<br>- Ph: n=39,181<br>- DC: n=17,903 | Rapid routine BBV testing with venous blood sampling (Ba) and oral testing (Ph, DC): HIV<br><br>Opt-out                                                             | Inmates<br><br>At entry (details varied between sites)<br><br>NR | Ba: 22%<br>Ph: 69%<br>DC: 79% | Ba: 2.0 %<br>Ph: 0.6%<br>DC: 0.8% | NR                                                                      | NR | NR                                                                            | NR | Very low <sup>3</sup> |
| Beckwith, 2011<br>(included in review Rumble, 2015 [3])<br><br>USA<br><br>Descriptive study   | Rhode Island Department of Corrections<br><br>n=NR (n=1,364 test offers)                                                             | Rapid routine BBV testing with oral testing: HIV<br><br>Opt-out                                                                                                     | Male inmates<br><br>At entry (within 24 hours)<br><br>NR         | 98% <sup>4</sup>              | 0.1% (new)                        | NR                                                                      | NR | 100% of HIV-positive inmates received test result, 0% of HIV-negative inmates | NR | Very low <sup>3</sup> |

|                                                                                                         |                                                                                                                      |                                                                                                                           |                                                                                           |                                              |                     |                                                                                   |    |                                                                                |    |                       |
|---------------------------------------------------------------------------------------------------------|----------------------------------------------------------------------------------------------------------------------|---------------------------------------------------------------------------------------------------------------------------|-------------------------------------------------------------------------------------------|----------------------------------------------|---------------------|-----------------------------------------------------------------------------------|----|--------------------------------------------------------------------------------|----|-----------------------|
| Strick, 2011<br>(included in review Rumble, 2015 [3])<br><br>USA<br><br>Descriptive study               | Washington State Department of Corrections<br><br>- Opt-in: n=16,908<br>- Opt-out: n=5,168                           | Standard routine BBV testing with venous blood sampling: HIV<br><br>Period of voluntary <sup>1</sup> , opt-in and opt-out | Male inmates<br><br>At entry (within 14 days)<br><br>NR                                   | Opt-out: 90%                                 | Opt-out: 0.1% (new) | Increase from 5% (testing on request) to 72% (opt-in) to 90% acceptance (opt-out) | NR | 100% of HIV-positive inmates received test result, NR for HIV-negative inmates | NR | Very low <sup>3</sup> |
| Beckwith, 2010<br>(included in review Rumble, 2015 [3])<br><br>USA<br><br>Descriptive study             | Rhode Island Department of Corrections<br><br>n=140,739                                                              | Standard routine BBV testing with venous blood sampling: HIV<br><br>Opt-out                                               | Male and female inmates<br><br>At entry (within 24 hours)<br><br>NR                       | NR                                           | 0.2% (new)          | NR                                                                                | NR | NR                                                                             | NR | Very low <sup>3</sup> |
| Kavasery, 2009a<br>(included in review Rumble, 2015 [3])<br><br>USA<br><br>Prospective controlled trial | York Correctional Institution, Connecticut<br><br>n=323:<br>- Immediate: n=108<br>- Early: n=108<br>- Delayed: n=107 | Rapid routine BBV testing with oral testing: HIV<br><br>Opt-out                                                           | Female inmates<br><br>At entry (3 arms: immediate, early, delayed) <sup>2</sup><br><br>NR | Immediate: 63%<br>Early: 91%<br>Delayed: 81% | 0.0%                | NR                                                                                | NR | 100% of HIV-positive inmates received test result, 99% of HIV-negative inmates | NR | Very low <sup>3</sup> |
| Kavasery, 2009b<br>(included in review Rumble, 2015 [3])<br><br>USA<br><br>Prospective controlled trial | New Haven Correctional Centre, Connecticut<br><br>n=298:<br>- Immediate: n=103<br>- Early: n=98<br>- Delayed: n=97   | Rapid routine BBV testing with oral testing: HIV<br><br>Opt-out                                                           | Male inmates<br><br>At entry (3 arms: immediate, early, delayed) <sup>2</sup><br><br>NR   | Immediate: 47%<br>Early: 70%<br>Delayed: 65% | 0.8% (new)          | NR                                                                                | NR | 100% of HIV-positive inmates received test result, NR for HIV-negative inmates | NR | Very low <sup>3</sup> |
| Foschi A 2015 [5]<br><br>Italy                                                                          | Single prison in Italy<br><br>N=711                                                                                  | Serology<br><br>Opt-in                                                                                                    | All detainees<br><br>At entry<br><br>NR                                                   | 91.5%                                        | 15/468 (3.2%)       | NR                                                                                | NR | NR                                                                             | NR | Conference abstract   |

|                                                         |                                                                                 |                                                                                                                                   |                                                                                                                                                                           |                                                                                                    |                                                                                                                                                                           |                                                                                                                  |    |    |    |  |          |
|---------------------------------------------------------|---------------------------------------------------------------------------------|-----------------------------------------------------------------------------------------------------------------------------------|---------------------------------------------------------------------------------------------------------------------------------------------------------------------------|----------------------------------------------------------------------------------------------------|---------------------------------------------------------------------------------------------------------------------------------------------------------------------------|------------------------------------------------------------------------------------------------------------------|----|----|----|--|----------|
| Cross-sectional study                                   |                                                                                 |                                                                                                                                   |                                                                                                                                                                           |                                                                                                    |                                                                                                                                                                           |                                                                                                                  |    |    |    |  |          |
| <b>During imprisonment</b>                              |                                                                                 |                                                                                                                                   |                                                                                                                                                                           |                                                                                                    |                                                                                                                                                                           |                                                                                                                  |    |    |    |  |          |
| Sagnelli, 2012 [6]<br>Italy<br>Cross-sectional study    | Six penitentiaries<br><br>n=3,468                                               | Analogous commercial immune enzymatic assay, Western blot confirmatory test<br><br>Opt-in                                         | All inmates<br><br>During imprisonment<br><br>Presentation on advantages of screening by peer-educators, pamphlets on importance of screening                             | 67.4%                                                                                              | 3.8%                                                                                                                                                                      | Higher acceptance than in the nine correctional facilities evaluated in this study before peer-education (14.1%) | NR | NR | NR |  | Very low |
| <b>At entry and during imprisonment</b>                 |                                                                                 |                                                                                                                                   |                                                                                                                                                                           |                                                                                                    |                                                                                                                                                                           |                                                                                                                  |    |    |    |  |          |
| Kivimets, 2014 [23]<br>Estonia<br>Cross-sectional study | All four prisons in Estonia<br><br>n=3,289                                      | Fourth generation HIV tests, Western blot confirmatory test<br><br>Opt-in                                                         | All inmates<br><br>At entry (timing NR) & during imprisonment when negative at entry (once a year or more often when necessary)<br><br>Counselling, not further specified | At entry: 97.3%<br><br>During imprisonment: 96% of inmates >1 year in prison during 3-month period | 11.8%<br><br>At entry only: 1.8% new HIV cases<br><br>Of those >1 year in prison during 3-month period, 12.5% HIV cases identified at entry and 0.06% during imprisonment | NR                                                                                                               | NR | NR | NR |  | Very low |
| Bauserman, 2001 [24]<br>USA<br>Comparative study        | Ten local detention and juvenile justice facilities in one state<br><br>n=1,314 | <b>Demonstration project:</b> Blood or oral HIV testing<br><br>Opt-in<br><br><b>Control:</b> Blood HIV testing only<br><br>Opt-in | Inmates in facilities for adults or youths<br><br>At entry (timing NR) for adults, during imprisonment for youth<br><br>Pre-test HIV counselling                          | NR                                                                                                 | NR                                                                                                                                                                        | Demonstration project compared to same time period year earlier: +63%                                            | NR | NR | NR |  | Very low |

|                                                    |                                                                                       |                                                                                                |                                                                                                                                                                                        |                                                                           |                                                |                                                                                             |    |    |               |                     |
|----------------------------------------------------|---------------------------------------------------------------------------------------|------------------------------------------------------------------------------------------------|----------------------------------------------------------------------------------------------------------------------------------------------------------------------------------------|---------------------------------------------------------------------------|------------------------------------------------|---------------------------------------------------------------------------------------------|----|----|---------------|---------------------|
| Cocoros, 2014 [13]<br>USA<br>Cross-sectional study | A county facility, for those awaiting trial and those sentenced <2.5 years<br>n=2,716 | Third-generation assay<br><br>Opt-in                                                           | All inmates<br><br>At entry (within few days) & during imprisonment when not tested at entry (during regular "sick call")<br><br>Mandatory HIV education session before choice to test | 24.6%                                                                     | 0.8%                                           | NR                                                                                          | NR | NR | NR            | Very low            |
| Arriola, 2001 [25]<br>USA<br>Cross-sectional study | Three adult county jails<br>n=NR                                                      | Confirmatory testing using a HIV antibody or a CD4 cell count test<br><br>Opt-in               | Inmates<br><br>In all jails at intake (one jail 3 days after admission, other jails NR), in two jails also during imprisonment<br><br>Disease education, post-test counselling         | NR                                                                        | 17% (7% newly diagnosed)                       | At all three facilities, the number of inmates HIV tested rose compared to previous testing | NR | NR | 49%           | Very low            |
| Rosen, 2009 [26]<br>USA<br>Cross-sectional study   | Eight intake prisons<br>n=54,664                                                      | Conventional ELISA, Western blot confirmatory test<br><br>Opt-in & client-/clinician-initiated | Newly incarcerated adult inmates<br><br>At entry (opt-in, within 21 days) and during imprisonment<br><br>Presentation on BBDs                                                          | At entry: 34%<br><br>During imprisonment: 6% of those not tested at entry | NR                                             | NR                                                                                          | NR | NR | NR            | Very low            |
| Kassira, 2001 [27]<br>USA<br>Surveillance study    | 27 correctional facilities in one state<br>n=22,338                                   | NR<br><br>Opt-in & client-/clinician-initiated                                                 | All inmates<br><br>At entry (opt-in, timing NR) and when symptoms warrant testing at clinics<br><br>Counselling, not further specified                                                 | At entry: 39%                                                             | At entry: 3.3%<br><br>Client-initiated: 12%    | NR                                                                                          | NR | NR | NR            | Very low            |
| Prestileo T 2006 [28]<br>Italy                     | 3 western Sicily prisons<br><br>Sample: 144 IDU inmates                               | NR<br><br>Opt-in                                                                               | IDU inmates<br><br>At entry and during stay                                                                                                                                            | NR                                                                        | 51/144 (35.4%)<br><br>-30 (20.8%) HIV infected | NR                                                                                          | NR | NR | 18/51 (35.2%) | Conference abstract |

|                                                                        |                                                         |                  |                                                                                      |       |  |                                                                                                                                                           |                     |    |    |    |                     |
|------------------------------------------------------------------------|---------------------------------------------------------|------------------|--------------------------------------------------------------------------------------|-------|--|-----------------------------------------------------------------------------------------------------------------------------------------------------------|---------------------|----|----|----|---------------------|
| Retrospective, longitudinal study                                      | -141 males<br>-3 females                                |                  | NR                                                                                   |       |  | -19 (13.2%)<br>HIV/HCV<br>coinfection<br>-2 (1.4%)<br>HIV/HBV<br>coinfection                                                                              |                     |    |    |    |                     |
| Marco A 2014 [29]<br><br>Spain<br><br>Prospective, observational study | 2 prisons in Barcelona<br><br>N=6,691                   | NR<br><br>Opt-in | All inmates<br><br>At entry and during stay<br><br>NR                                | NR    |  | 68/6.691 (0.97%)<br><br>-mean age 34<br>-55.4% foreigners<br>-60% IDU<br>-48.3% Late diagnosis (<350 CD4 mm3)<br>-38.3% advanced infection (<200 CD4 mm3) | NR                  | NR | NR | NR | Conference abstract |
| Lugo RG 2012 [30]<br><br>Spain<br><br>Cross-sectional study            | 3 penitentiary institutions in Catalonia<br><br>N=1,410 | NR<br><br>NR     | All inmates<br><br>At entry and during stay<br><br>NR                                | NR    |  | 10.9 % overall<br><br>-10.3% among males (majority between 25 and 39 years old)<br>17% among females (majority between 35 and 39 years old)               | NR                  | NR | NR | NR | Conference abstract |
| Babudieri S 2015 [8]<br><br>Italy<br><br>Cross-sectional study         | 4 Italian prisons<br><br>N=2,233                        | NR<br><br>Opt-in | All inmates<br><br>At entry and during stay<br><br>NR                                | 83.8% |  | 87/2233 (3.9%)                                                                                                                                            | NR                  | NR | NR | NR | Conference abstract |
| Babudieri S 2012 [9]<br><br>Italy<br><br>Cross-sectional study         | 20 Italian prisons<br><br>N=4,072                       | NR<br><br>Opt-in | All inmates<br><br>At entry and during stay<br><br>Peed educators and ID specialists | 56.3% |  | 5.6%                                                                                                                                                      | From 14.1% to 56.3% | NR | NR | NR | Conference abstract |



|                                |                                                                                     |                                                                    |                                                                                                                                                                                 |                                              |                                                                                                            |                                                            |    |                           |                   |                     |
|--------------------------------|-------------------------------------------------------------------------------------|--------------------------------------------------------------------|---------------------------------------------------------------------------------------------------------------------------------------------------------------------------------|----------------------------------------------|------------------------------------------------------------------------------------------------------------|------------------------------------------------------------|----|---------------------------|-------------------|---------------------|
| Babudieri S 2008 [31]          | 28 European prisons<br>N=19,772                                                     | NR<br>NR                                                           | All inmates<br>At entry and during stay<br>NR                                                                                                                                   | 12,560/19,772 (63.5%)                        | 1,351/12,560 (10.8%) overall<br>- 22.7% in IDU<br>- 4.0% in foreigners<br>-10.7% in men<br>-11.1% in women | NR                                                         | NR | NR                        | 845/1,430 (59.1%) | Conference abstract |
| <b>At entry and on release</b> |                                                                                     |                                                                    |                                                                                                                                                                                 |                                              |                                                                                                            |                                                            |    |                           |                   |                     |
| Jacomet, 2016 [2]              | Two prisons<br>n=702                                                                | - At entry: ELISA<br>- On release: rapid POC test<br>Opt-in        | Adult inmates<br>At entry and on release (timing NR)<br>Posters, personalised information letters                                                                               | At entry: 91.3%<br>On release: 4.2%          | At entry: 0.3% (0% newly diagnosed)<br>On release: 0%                                                      | NR                                                         | NR | NR                        | NR                | Very low            |
| <b>At release</b>              |                                                                                     |                                                                    |                                                                                                                                                                                 |                                              |                                                                                                            |                                                            |    |                           |                   |                     |
| Sieck, 2011 [1]                | A male prison housing minimum, medium, close, and maximum security inmates<br>n=916 | Blood test, not further specified<br>Mandatory                     | All inmates scheduled for release<br>At release (4-6 weeks before scheduled release day)<br>Letter describing STD testing process                                               | NA                                           | 0.1%                                                                                                       | NR                                                         | NR | NR                        | NR                | Very low            |
| Simonsen, 2015 [32]            | One jail facility<br>n=507                                                          | OraQuick rapid HIV test, confirmatory test not specified<br>Opt-in | Jail inmates<br>At release (during discharge proceedings)<br>Educational materials, pre- and post-test counselling, active referral of positive testers to community-based care | 60%                                          | 0.3%                                                                                                       | NR                                                         | NR | 100% received test result | 100% (n=1)        | Very low            |
| <b>Not specified</b>           |                                                                                     |                                                                    |                                                                                                                                                                                 |                                              |                                                                                                            |                                                            |    |                           |                   |                     |
| Pearson, 2014 [33]             | Two pairs of correctional facilities (no)                                           | NR<br>NR                                                           | Admitted inmates<br>NR                                                                                                                                                          | Facility pair 1: 48%<br>Facility pair 2: 53% | NR                                                                                                         | Combined log OR acceptance rate: 0.16 (95% CI - 0.24-0.57) | NR | NR                        | NR                | Moderate            |

|                                                               |                                                                                                                                                                                                          |                  |                                                                                                                                                                                                                                                                                             |                                              |                 |                                                                                                                                        |    |    |               |                     |
|---------------------------------------------------------------|----------------------------------------------------------------------------------------------------------------------------------------------------------------------------------------------------------|------------------|---------------------------------------------------------------------------------------------------------------------------------------------------------------------------------------------------------------------------------------------------------------------------------------------|----------------------------------------------|-----------------|----------------------------------------------------------------------------------------------------------------------------------------|----|----|---------------|---------------------|
| Cluster-randomised trial                                      | maximum security)<br>n=3,300                                                                                                                                                                             |                  | <b>Intervention</b><br>Modified NIATx process improvement model* (staff receive HIV service training and are coached in the model)                                                                                                                                                          |                                              |                 |                                                                                                                                        |    |    |               |                     |
|                                                               |                                                                                                                                                                                                          |                  | Admitted inmates<br>NR                                                                                                                                                                                                                                                                      | Facility pair 1: 49%<br>Facility pair 2: 44% |                 |                                                                                                                                        |    |    |               |                     |
|                                                               |                                                                                                                                                                                                          |                  | <b>Control</b><br>Staff only receive HIV service training                                                                                                                                                                                                                                   |                                              |                 |                                                                                                                                        |    |    |               |                     |
| Ross, 2006 [34]<br><br>USA<br><br>Longitudinal study          | Five randomly selected Project Wall Talk participating units vs. 5 matched non-participating units in one state<br><br>n=590 peer educators and 2,506 student inmates (n=NR for non-participating units) | NR<br><br>NR     | <b>Project Wall Talk:</b><br>Peer educator inmates and student inmates<br><br>NR<br><br>Peer-education program (intensive training for peer educators, ongoing HIV education sessions given by peer educators to inmates)<br><br><b>Control:</b><br>Prison unit inmates<br><br>NR<br><br>NR | NR                                           | NR              | At 12-month follow-up:<br>p=0.000; OR: 2.76, 95% CI 2.21-3.44**<br><br>At 18-month follow-up:<br>p=0.000; OR: 1.78, 95% CI 1.40-2.25** | NR | NR | NR            | Low                 |
| Gallego C 2010 [35]<br><br>Spain<br><br>Cross-sectional study | Prisons in Catalonia<br><br>N=10,857                                                                                                                                                                     | NR<br><br>NR     | All inmates<br><br>NR<br><br>NR                                                                                                                                                                                                                                                             | 82.5%                                        | 769 (9.9%)      | NR                                                                                                                                     | NR | NR | 600/769 (78%) | Conference abstract |
| Monarca R 2002 [36]<br><br>Italy                              | Single prison in Italy<br><br>N=320                                                                                                                                                                      | NR<br><br>Opt-in | All inmates<br><br>NR                                                                                                                                                                                                                                                                       | NR                                           | 85/320 (26.56%) | NR                                                                                                                                     | NR | NR | NR            | Conference abstract |

|                       |  |  |    |  |  |  |  |  |  |  |
|-----------------------|--|--|----|--|--|--|--|--|--|--|
| Cross-sectional study |  |  | NR |  |  |  |  |  |  |  |
|-----------------------|--|--|----|--|--|--|--|--|--|--|

Ba=Baltimore, BBV=blood-borne virus, CI=confidence interval, DC=District of Colombia, DBST=dried blood spot testing, ELISA=enzyme-linked immunosorbent assay, HBV=hepatitis B virus, HCV=hepatitis C virus, HIV=human immunodeficiency virus, ID=infectious diseases; IDU=injecting drug user, ITT=intention to treat, NIATx=Network for the Improvement of Addiction Treatment, NR=not reported, OR=odds ratio, Ph=Philadelphia, RCT=randomised controlled trial, RNA=ribonucleic acid, RR=relative risk, STD=sexually transmitted disease, USA=United States of America

<sup>1</sup> Period of HIV testing provided only on request, if clinically indicated, or by court order (data not included in this table; positivity rate of 0.5%)

<sup>2</sup> Immediate (during initial medical screen on night of admission); early (during a physical examination the following evening); delayed (7 days after arrival)

<sup>3</sup> This article was included in the review of Rumble et al., 2015, which has a very low level of evidence

<sup>4</sup> Denominator is not the total number of inmates as in other studies, but inmates that were offered testing

\*NIATx approach: begins with walking through the service delivery to see it from the service recipient's point of view and to detect difficulties. Next, the teams use rapid plan-do-study-act cycles: identify specific problems and generate solutions (plan), try out new processes (do), measure and assess the outcomes (study), and implement the solution or make additional changes (act). Local change teams repeat the cycle for any other problems discovered.

\*\* Number of HIV tests/daily census at 12 months: project = 2.08%, control = 0.77%, at 18 months: project = 1.36%, control = 0.69%. As the denominator is the daily census, rates are not comparable to other studies, and therefore not added to the acceptance column of the table above.

**Web Table 8: Included records on active case finding for Chlamydia and Gonorrhoea**

| Reference, country, study design                 | Prison setting, sample                                                                                                                                                                         | Testing method, offer           | Who, when, promotion                                                                                                                                                                                                                                                    | Uptake                                                                               | Positivity rate                                           | Change in number or % tested | Change prevalence /incidence | Other | Treatment initiation                                                            | Level of evidence |
|--------------------------------------------------|------------------------------------------------------------------------------------------------------------------------------------------------------------------------------------------------|---------------------------------|-------------------------------------------------------------------------------------------------------------------------------------------------------------------------------------------------------------------------------------------------------------------------|--------------------------------------------------------------------------------------|-----------------------------------------------------------|------------------------------|------------------------------|-------|---------------------------------------------------------------------------------|-------------------|
| <b>At entry</b>                                  |                                                                                                                                                                                                |                                 |                                                                                                                                                                                                                                                                         |                                                                                      |                                                           |                              |                              |       |                                                                                 |                   |
| Mertz, 2002 [37]<br>USA<br>Cross-sectional study | 2 county jails, 1 city jail, 1 detention centre<br><br>n=NR (recruited inmates: County jail 1 n= 2,205 and county jail 2 & city jail n= 1,819; inmates gave consent: detention centre n=1,931) | LCx assay (urine)<br><br>Opt-in | Women entering one of four jails<br><br>At intake (county jail 1 within 8 hours, county jail 2 and city jail at median 2 days after intake, detention centre at median 11 days after booking)<br><br>Active referral for treatment when released before knowing results | County jail 1: 90.7%<br>County jail 2 and city jail: 85.1%<br>Detention centre: 100% | Only stratified by age and ethnicity, see evidence tables | NR                           | NR                           | NR    | County jail 1: 61%<br>County jail 2 & city jail: 85%<br>Detention centre: 76.8% | Very low          |
| Arriola, 2001 [25]                               | Two adult county jails                                                                                                                                                                         | NR<br><br>Opt-in                | All inmates                                                                                                                                                                                                                                                             | NR                                                                                   | Chlamydia: 6.5%                                           | NR                           | NR                           | NR    | Chlamydia: 79%                                                                  | Very low          |

|                            |                                                                          |                                                                                  |                                                                           |                      |                           |    |    |                                                                                    |                 |                     |
|----------------------------|--------------------------------------------------------------------------|----------------------------------------------------------------------------------|---------------------------------------------------------------------------|----------------------|---------------------------|----|----|------------------------------------------------------------------------------------|-----------------|---------------------|
| USA                        | n=NR                                                                     |                                                                                  | At intake (timing NR)                                                     |                      | Gonorrhoea: 3.1%          |    |    |                                                                                    | Gonorrhoea: 66% |                     |
| Cross-sectional study      |                                                                          |                                                                                  | Disease education, post-test counselling                                  |                      |                           |    |    |                                                                                    |                 |                     |
| <b>During imprisonment</b> |                                                                          |                                                                                  |                                                                           |                      |                           |    |    |                                                                                    |                 |                     |
| Brown, 2014 [38]           | One metropolitan jail (sentenced, awaiting trial, immigration violators) | PCR and DNA probe protocol (urine)                                               | All inmates                                                               | NR                   | Chlamydia: 5.3%           | NR | NR | NR                                                                                 | NR              | Low                 |
| USA                        | n=NR (n=394 tested)                                                      | Opt-in                                                                           | During imprisonment                                                       |                      | Gonorrhoea: 0.8%          |    |    |                                                                                    |                 |                     |
| Case-control study         |                                                                          |                                                                                  | Education on STIs before choice to test, post-test counselling            |                      |                           |    |    |                                                                                    |                 |                     |
| Newman, 2003 [39]          | One main federal prison                                                  | <b>Urine vs. vaginal swab</b> specimens                                          | All incarcerated women                                                    | - 82.1%, of which:   | NR                        | NR | NR | NR                                                                                 | NR              | Very low            |
| USA                        | n=800                                                                    | Opt-in                                                                           | At a "call out" (routinely used system to gather inmates in groups of 30) | - 97% both specimens |                           |    |    |                                                                                    |                 |                     |
| Survey study               |                                                                          |                                                                                  | NR                                                                        | - 1.5% swab only     |                           |    |    |                                                                                    |                 |                     |
|                            |                                                                          |                                                                                  |                                                                           | - 1.9% urine only    |                           |    |    |                                                                                    |                 |                     |
| Lopez-Corbeto E 2012 [40]  | 3 prisons in Barcelona                                                   | Urine sample for Chlamydia trachomatis (CT)                                      | All inmates                                                               | NR                   | - 39/430 (11%)            | NR | NR | -No use of condom in 70% of cases                                                  | NR              | Conference abstract |
| Spain                      | N=430 young inmates                                                      | NR                                                                               | During imprisonment                                                       |                      | -7 Spaniards              |    |    | - Prison entry <1 year associated with OR 4.15 (CI 95%, 1.54-11.2) of CT diagnosis |                 |                     |
| Cross-sectional study      |                                                                          |                                                                                  | NR                                                                        |                      | -32 foreigners            |    |    |                                                                                    |                 |                     |
| Torrez E 2010 [41]         | 1 youth prison in Barcelona                                              | Urine sample for Chlamydia trachomatis (CT) And Neisseria gonorrhoea (NG) By PCR | Young (<25 years old) inmates                                             | 418/425 (98.4%)      | CT = 20(6%) NG = 1 (0.2%) | NR | NR | All CT cases were asymptomatic                                                     | NR              | Conference abstract |
| Spain                      | N=430                                                                    |                                                                                  | During imprisonment                                                       |                      |                           |    |    |                                                                                    |                 |                     |
| Cross-sectional study      |                                                                          |                                                                                  | NR                                                                        |                      |                           |    |    |                                                                                    |                 |                     |

|                                                     |                                                                                                             | NR                                                                                                                    |                                                                                                                                                                                                                                        |                |                                                                                |                                                                   |    |                                                                                                                                                                                                                                |                           |          |
|-----------------------------------------------------|-------------------------------------------------------------------------------------------------------------|-----------------------------------------------------------------------------------------------------------------------|----------------------------------------------------------------------------------------------------------------------------------------------------------------------------------------------------------------------------------------|----------------|--------------------------------------------------------------------------------|-------------------------------------------------------------------|----|--------------------------------------------------------------------------------------------------------------------------------------------------------------------------------------------------------------------------------|---------------------------|----------|
| <b>At release</b>                                   |                                                                                                             |                                                                                                                       |                                                                                                                                                                                                                                        |                |                                                                                |                                                                   |    |                                                                                                                                                                                                                                |                           |          |
| Sieck, 2011 [1]<br>USA<br>Cross-sectional study     | A male prison housing minimum, medium, close, and maximum security inmates<br>n=916                         | Genital swab test, not further specified*<br><br>Opt-in                                                               | All inmates scheduled for release<br><br>At release (4-6 weeks before the scheduled release day)<br><br>Letter describing STD testing process                                                                                          | 37.6%*         | Chlamydia: 0.6%<br>Gonorrhoea: 0.0%*                                           | NR                                                                | NR | NR                                                                                                                                                                                                                             | NR                        | Very low |
| <b>Opt-in during imprisonment, opt-out at entry</b> |                                                                                                             |                                                                                                                       |                                                                                                                                                                                                                                        |                |                                                                                |                                                                   |    |                                                                                                                                                                                                                                |                           |          |
| Shaikh, 2015 [42]<br>USA<br>Cross-sectional study   | One jail facility<br><br>n=2,261 new inmates within 1 week and all inmates residing in housing units (n=NR) | DNA amplification probe protocol (urine)<br><br>Opt-in<br><br>DNA amplification probe protocol (urine)<br><br>Opt-out | All inmates<br><br>Weekly/bi-weekly education, followed by testing opportunity<br><br>Education on STIs<br><br>All inmates<br><br>At entry (timing NR)<br><br>NR                                                                       | NR<br><br>NR   | Chlamydia: 5.6%<br>Gonorrhoea: 0.9%<br><br>Chlamydia: 9.7%<br>Gonorrhoea: 1.3% | Opt-in vs. opt-out:<br>- Chlamydia: p=0.006<br>- Gonorrhoea: p=ns | NR | NR                                                                                                                                                                                                                             | NR                        | Low      |
| <b>Opt-in at entry versus client-initiated</b>      |                                                                                                             |                                                                                                                       |                                                                                                                                                                                                                                        |                |                                                                                |                                                                   |    |                                                                                                                                                                                                                                |                           |          |
| Franklin, 2012 [43]<br>USA<br>Cross-sectional study | Jail system with 11 facilities (pre-trial and <1 year sentence)<br><br>n=2,417                              | <b>At entry:</b><br>NAAT combination assay (urine)<br><br>Opt-in<br><br><b>Client-initiated:</b>                      | All newly incarcerated males who completed medical intake<br><br>At entry (within 24 hours)<br><br>STI clinic brochures, instruction to follow-up at clinic, letter of aftercare mailed to residential address<br><br>All male inmates | 100%<br><br>NR | 6.4% chlamydia<br>0.9% gonorrhoea<br><br>NR                                    | NR                                                                | NR | <i>Sensitivity, specificity, and positive predictive value for positivity:</i><br>- Urethral symptoms: 2.5% (95% CI 0.8-6.7), 98.4% (95% CI 97.7-98.8), and 10.3% (95% CI 3.3-25.1), respectively<br>- LET: 10.5% (95% CI 6.4- | 63% prior to jail release | Very low |

|                                                       |                                                                                                                            |                                                                                |                                                                                             |                                                                                 |                                     |                                                                                                                             |                                                                                                                                                                                                                                                                                                                                                                                                                                                                                                                                                                                                         |                                                                              |                                                                |          |     |       |      |   |       |       |   |       |     |  |      |          |     |       |       |   |       |       |   |     |      |    |    |          |
|-------------------------------------------------------|----------------------------------------------------------------------------------------------------------------------------|--------------------------------------------------------------------------------|---------------------------------------------------------------------------------------------|---------------------------------------------------------------------------------|-------------------------------------|-----------------------------------------------------------------------------------------------------------------------------|---------------------------------------------------------------------------------------------------------------------------------------------------------------------------------------------------------------------------------------------------------------------------------------------------------------------------------------------------------------------------------------------------------------------------------------------------------------------------------------------------------------------------------------------------------------------------------------------------------|------------------------------------------------------------------------------|----------------------------------------------------------------|----------|-----|-------|------|---|-------|-------|---|-------|-----|--|------|----------|-----|-------|-------|---|-------|-------|---|-----|------|----|----|----------|
|                                                       |                                                                                                                            | Laboratory urinalysis STI-specific testing (urethral swab)<br>Client-initiated | Based on self-reported symptoms or signs, or urine dipstick testing (including LET)<br>NR   |                                                                                 |                                     |                                                                                                                             |                                                                                                                                                                                                                                                                                                                                                                                                                                                                                                                                                                                                         | 16.5), 97.5% (95% CI 96.7-98.1), and 23.0% (95% CI 14.3-34.5), respectively  |                                                                |          |     |       |      |   |       |       |   |       |     |  |      |          |     |       |       |   |       |       |   |     |      |    |    |          |
| Broad, 2009 [44]<br><br>USA<br><br>Before-after study | One county jail (pre-detention)<br><br>n=NR                                                                                | NAAT (urethral/cervical swab)<br>Opt-in                                        | <b>Universal program:</b><br>All inmates<br><br>All: at intake (timing NR)<br>NR            | NR                                                                              | NR                                  | NR                                                                                                                          | <i>Change reported cases after discontinuation of the universal program:</i><br>Chlamydia:<br><table border="1"> <tr> <td></td> <td>Jail</td> <td>Chi-cago</td> </tr> <tr> <td>All</td> <td>-82.3</td> <td>-9.3</td> </tr> <tr> <td>M</td> <td>-91.7</td> <td>-33.3</td> </tr> <tr> <td>F</td> <td>-20.3</td> <td>2.5</td> </tr> </table><br>Gonorrhoea:<br><table border="1"> <tr> <td></td> <td>Jail</td> <td>Chi-cago</td> </tr> <tr> <td>All</td> <td>-70.9</td> <td>-12.9</td> </tr> <tr> <td>M</td> <td>-90.5</td> <td>-19.5</td> </tr> <tr> <td>F</td> <td>5.5</td> <td>-5.6</td> </tr> </table> |                                                                              | Jail                                                           | Chi-cago | All | -82.3 | -9.3 | M | -91.7 | -33.3 | F | -20.3 | 2.5 |  | Jail | Chi-cago | All | -70.9 | -12.9 | M | -90.5 | -19.5 | F | 5.5 | -5.6 | NR | NR | Very low |
|                                                       |                                                                                                                            |                                                                                | Jail                                                                                        |                                                                                 |                                     |                                                                                                                             |                                                                                                                                                                                                                                                                                                                                                                                                                                                                                                                                                                                                         | Chi-cago                                                                     |                                                                |          |     |       |      |   |       |       |   |       |     |  |      |          |     |       |       |   |       |       |   |     |      |    |    |          |
| All                                                   | -82.3                                                                                                                      | -9.3                                                                           |                                                                                             |                                                                                 |                                     |                                                                                                                             |                                                                                                                                                                                                                                                                                                                                                                                                                                                                                                                                                                                                         |                                                                              |                                                                |          |     |       |      |   |       |       |   |       |     |  |      |          |     |       |       |   |       |       |   |     |      |    |    |          |
| M                                                     | -91.7                                                                                                                      | -33.3                                                                          |                                                                                             |                                                                                 |                                     |                                                                                                                             |                                                                                                                                                                                                                                                                                                                                                                                                                                                                                                                                                                                                         |                                                                              |                                                                |          |     |       |      |   |       |       |   |       |     |  |      |          |     |       |       |   |       |       |   |     |      |    |    |          |
| F                                                     | -20.3                                                                                                                      | 2.5                                                                            |                                                                                             |                                                                                 |                                     |                                                                                                                             |                                                                                                                                                                                                                                                                                                                                                                                                                                                                                                                                                                                                         |                                                                              |                                                                |          |     |       |      |   |       |       |   |       |     |  |      |          |     |       |       |   |       |       |   |     |      |    |    |          |
|                                                       | Jail                                                                                                                       | Chi-cago                                                                       |                                                                                             |                                                                                 |                                     |                                                                                                                             |                                                                                                                                                                                                                                                                                                                                                                                                                                                                                                                                                                                                         |                                                                              |                                                                |          |     |       |      |   |       |       |   |       |     |  |      |          |     |       |       |   |       |       |   |     |      |    |    |          |
| All                                                   | -70.9                                                                                                                      | -12.9                                                                          |                                                                                             |                                                                                 |                                     |                                                                                                                             |                                                                                                                                                                                                                                                                                                                                                                                                                                                                                                                                                                                                         |                                                                              |                                                                |          |     |       |      |   |       |       |   |       |     |  |      |          |     |       |       |   |       |       |   |     |      |    |    |          |
| M                                                     | -90.5                                                                                                                      | -19.5                                                                          |                                                                                             |                                                                                 |                                     |                                                                                                                             |                                                                                                                                                                                                                                                                                                                                                                                                                                                                                                                                                                                                         |                                                                              |                                                                |          |     |       |      |   |       |       |   |       |     |  |      |          |     |       |       |   |       |       |   |     |      |    |    |          |
| F                                                     | 5.5                                                                                                                        | -5.6                                                                           |                                                                                             |                                                                                 |                                     |                                                                                                                             |                                                                                                                                                                                                                                                                                                                                                                                                                                                                                                                                                                                                         |                                                                              |                                                                |          |     |       |      |   |       |       |   |       |     |  |      |          |     |       |       |   |       |       |   |     |      |    |    |          |
| NAAT (urethral/cervical swab)<br>Client-initiated     | <b>Discontinuation program:</b><br>All inmates<br><br>Males: symptom-based; females: universal at intake (timing NR)<br>NR |                                                                                |                                                                                             |                                                                                 |                                     |                                                                                                                             |                                                                                                                                                                                                                                                                                                                                                                                                                                                                                                                                                                                                         |                                                                              |                                                                |          |     |       |      |   |       |       |   |       |     |  |      |          |     |       |       |   |       |       |   |     |      |    |    |          |
| <b>Opt-out at entry versus client-initiated</b>       |                                                                                                                            |                                                                                |                                                                                             |                                                                                 |                                     |                                                                                                                             |                                                                                                                                                                                                                                                                                                                                                                                                                                                                                                                                                                                                         |                                                                              |                                                                |          |     |       |      |   |       |       |   |       |     |  |      |          |     |       |       |   |       |       |   |     |      |    |    |          |
| Cole, 2014 [45]<br><br>USA<br><br>Before-after study  | One county jail<br><br>n=17,065                                                                                            | NAAT (urine)<br>Opt-out                                                        | All female inmates<br>At entry (timing NR)<br>NR                                            | 78.1%<br>28.3% opted out in 1 <sup>st</sup> year, 16.8% in 2 <sup>nd</sup> year | Gonorrhoea: 2.5%<br>Chlamydia: 7.6% | <i>Mean tests per month:</i><br>155 client-initiated vs. 455 opt-out (similar jail census during both periods, p not given) | <i>Mean diagnoses per month:</i><br>9.3 client-initiated vs. 40.8 opt-out (similar jail census during both periods, p not given)                                                                                                                                                                                                                                                                                                                                                                                                                                                                        | Acceptance 68% during first and 45% during last 3 months of year 2 (p<0.001) | 69.5% (treatment rates remained constant during opt-in period) | Low      |     |       |      |   |       |       |   |       |     |  |      |          |     |       |       |   |       |       |   |     |      |    |    |          |
|                                                       |                                                                                                                            | NAAT (urine)<br>Client-initiated                                               | All female inmates<br>When inmates request it, or when reported symptoms/risk factors<br>NR | NR                                                                              | NR                                  |                                                                                                                             |                                                                                                                                                                                                                                                                                                                                                                                                                                                                                                                                                                                                         | NR                                                                           | NR                                                             |          |     |       |      |   |       |       |   |       |     |  |      |          |     |       |       |   |       |       |   |     |      |    |    |          |
| <b>At entry versus client-initiated</b>               |                                                                                                                            |                                                                                |                                                                                             |                                                                                 |                                     |                                                                                                                             |                                                                                                                                                                                                                                                                                                                                                                                                                                                                                                                                                                                                         |                                                                              |                                                                |          |     |       |      |   |       |       |   |       |     |  |      |          |     |       |       |   |       |       |   |     |      |    |    |          |

|                                                 |                         |                                                                     |                                     |    |    |    |                                                                                                                                   |    |    |          |                           |
|-------------------------------------------------|-------------------------|---------------------------------------------------------------------|-------------------------------------|----|----|----|-----------------------------------------------------------------------------------------------------------------------------------|----|----|----------|---------------------------|
| Pathela, 2009 [46]<br>USA<br>Before-after study | Six adult jails<br>n=NR | <b>Active case finding program:</b><br>Dual NAAT (urine)            | All incarcerated men aged ≤35 years | NR | NR | NR | <i>In jails:</i><br>- Chlamydia: +1636%<br>- Gonorrhoea: +885%<br><br><i>City-wide:</i><br>- Chlamydia: +59%<br>- Gonorrhoea: +4% | NR | NR | Very low |                           |
|                                                 |                         | NR                                                                  | At entry (within 72 hours)          |    |    |    |                                                                                                                                   |    |    |          | NR                        |
|                                                 |                         | <b>Before program:</b><br>Diagnostic testing, not further specified | All incarcerated men                |    |    |    |                                                                                                                                   |    |    |          | When reporting complaints |
|                                                 |                         | Client-initiated                                                    | NR                                  |    |    |    |                                                                                                                                   |    |    |          |                           |

CI=confidence interval, CT= Chlamydia trachomatis, DNA= deoxyribo nucleic acid, LCx=ligase chain reaction, LET=leukocyte esterase test, NAAT=nucleic acid amplification technology, NG= Neisseria gonorrhoea, NR=not reported, OR=odds ratio, PCR=polymerase chain reaction, STD=sexually transmitted disease, STI=sexually transmitted infection, USA=United States of America

\*An opt-in physical examination for herpes simplex virus and human papillomavirus was also offered; 44.7% of inmates accepted the physical exam, 2.2% were found to be infected with human papillomavirus, none with herpes simplex virus

**Web Table 9: Included records on active case finding for Syphilis**

| Reference, country, study design                   | Prison setting, sample                                    | Testing method, offer                               | Who, when, promotion                                                                              | Uptake | Positivity rate                                            | Change in number or % tested | Change prevalence /incidence                                                                                                                 | Other | Treatment initiation | Level of evidence |
|----------------------------------------------------|-----------------------------------------------------------|-----------------------------------------------------|---------------------------------------------------------------------------------------------------|--------|------------------------------------------------------------|------------------------------|----------------------------------------------------------------------------------------------------------------------------------------------|-------|----------------------|-------------------|
| <b>At entry</b>                                    |                                                           |                                                     |                                                                                                   |        |                                                            |                              |                                                                                                                                              |       |                      |                   |
| Kahn, 2002 [47]<br>USA<br>Cross-sectional study    | One jail (awaiting trial or sentence <1 year)<br>n=50,941 | RPR (blood), MHA-TP confirmatory test<br><br>Opt-in | All inmates entering jail<br><br>At entry (within 24 hours)<br><br>NR                             | 76%    | 6% confirmed syphilis<br>1.3% diagnosed untreated syphilis | NR                           | <i>From start to 4 years later:</i><br>Untreated syphilis in jail: -64%<br>Early syphilis in jail: -68%<br>Early syphilis in community: -79% | NR    | NR                   | Very low          |
| Arriola, 2001 [25]<br>USA<br>Cross-sectional study | One adult county jail<br>n=NR                             | NR<br><br>Opt-in                                    | Inmates<br><br>At intake (3 days after admission)<br><br>Disease education, post-test counselling | NR     | 2.0%                                                       | NR                           | NR                                                                                                                                           | NR    | 100%                 | Very low          |

|                                                        |                                                           |                                                                                             |                                                                                                                                       |                         |                                                                                    |                                                                                                                  |                                            |                                                                                                                           |       |                     |
|--------------------------------------------------------|-----------------------------------------------------------|---------------------------------------------------------------------------------------------|---------------------------------------------------------------------------------------------------------------------------------------|-------------------------|------------------------------------------------------------------------------------|------------------------------------------------------------------------------------------------------------------|--------------------------------------------|---------------------------------------------------------------------------------------------------------------------------|-------|---------------------|
| Silberstein, 2000 [48]<br>USA<br>Cross-sectional study | One jail (awaiting trial or sentence <1 year)<br>n=26,829 | RPR (blood), MHA-TP confirmatory test<br>NR                                                 | All inmates entering jail<br>At entry (within 24 hours)<br>NR                                                                         | 69%                     | 1.4% confirmed syphilis                                                            | NR                                                                                                               | Prevalence syphilis from year 1 to 2: -35% | Estimated 6.42 total case-equivalents of congenital and 43.74 total case-equivalents of late/neurosyphilis were prevented | 56.7% | Very low            |
| Heimberger, 1993 [49]<br>USA<br>Cross-sectional study  | One jail (awaiting trial or sentence <1 year)<br>n=12,685 | ART (blood), FTA-ABS confirmatory test<br>NR                                                | All inmates entering jail<br>At entry (within 24 hours)<br>NR                                                                         | 77%                     | 2.6% confirmed syphilis<br>1.6% newly diagnosed syphilis                           | NR                                                                                                               | NR                                         | NR                                                                                                                        | 83.5% | Very low            |
| <b>During imprisonment</b>                             |                                                           |                                                                                             |                                                                                                                                       |                         |                                                                                    |                                                                                                                  |                                            |                                                                                                                           |       |                     |
| Sagnelli, 2012 [6]<br>Italy<br>Cross-sectional study   | Six penitentiaries<br>n=3,468                             | TPHA, confirmed with FTA-ABS or VDRL tests<br>Opt-in                                        | All inmates<br>During imprisonment<br>Presentation on advantages of screening by peer-educators, pamphlets on importance of screening | 55.7%                   | 2.1%                                                                               | Higher acceptance than in the nine correctional facilities evaluated in this study before peer-education (10.0%) | NR                                         | NR                                                                                                                        | NR    | Very low            |
| Babudieri S 2012 [9]<br>Italy<br>Cross-sectional study | 20 Italian prisons<br>N=4,072                             | Test for syphilis (ELISA)<br>-TPHA and VDRL offered to positive patients at screening<br>NR | All prisoners<br>During imprisonment<br>NR                                                                                            | 56.3%                   | - 2.3% ELISA<br>Of ELISA screening positive cases: TPHA+, FTA-abs positive (85.7%) | NR                                                                                                               | NR                                         | NR                                                                                                                        | NR    | Conference abstract |
| Foschi A 2015 [5]<br>Italy                             | Single prison in Italy (Opera prison, Milan)              | Syphilis Serology<br>Opt-in                                                                 | All newly incarcerated prisoners<br>At entry                                                                                          | 511/711 (71.8%) reached | 17/468 (3.6%)                                                                      | NR                                                                                                               | NR                                         | NR                                                                                                                        | NR    | Conference abstract |



|                                                 |                                                                                         |                                                    |                                                                                                                                               |                                                       |      |    |    |    |    |          |
|-------------------------------------------------|-----------------------------------------------------------------------------------------|----------------------------------------------------|-----------------------------------------------------------------------------------------------------------------------------------------------|-------------------------------------------------------|------|----|----|----|----|----------|
| Cross-sectional study                           | N=711                                                                                   |                                                    | Pre-emptive counselling                                                                                                                       | for screening 468/511 (91.5%) accepted to be screened |      |    |    |    |    |          |
| <b>At release</b>                               |                                                                                         |                                                    |                                                                                                                                               |                                                       |      |    |    |    |    |          |
| Sieck, 2011 [1]<br>USA<br>Cross-sectional study | A male prison housing minimum, medium, close, and maximum security inmates<br><br>n=916 | Blood test, not further specified<br><br>Mandatory | All inmates scheduled for release<br><br>At release (4-6 weeks before the scheduled release day)<br><br>Letter describing STD testing process | NA                                                    | 0.1% | NR | NR | NR | NR | Very low |

ART=automated reagin test, CI=confidence interval, ELISA=enzyme-linked immuosorbent assay, FTA-ABS=fluorescent treponemal antibody absorbed, MHA-TP=microhemagglutination for Treponema pallidum, NA=not applicable, NR=not reported, OR=odds ratio, RPR=rapid plasma reagin, STD=sexually transmitted disease, TPHA=Treponema pallidum hemagglutination assay, VDRL=Venereal Disease Research Laboratory, USA=United States of America

**Web Table 10: Included records on active case finding for Trichomoniasis**

| Reference, country, study design               | Prison setting, sample                                                                               | Testing method, offer                                                                                 | Who, when, promotion                                                                                                                       | Uptake       | Positivity rate | Change in number or % tested | Change prevalence /incidence | Other | Treatment initiation | Level of evidence |
|------------------------------------------------|------------------------------------------------------------------------------------------------------|-------------------------------------------------------------------------------------------------------|--------------------------------------------------------------------------------------------------------------------------------------------|--------------|-----------------|------------------------------|------------------------------|-------|----------------------|-------------------|
| <b>Opt-in at entry versus client-initiated</b> |                                                                                                      |                                                                                                       |                                                                                                                                            |              |                 |                              |                              |       |                      |                   |
| Roth, 2011 [50]<br>USA<br>Before-after study   | One privately operating minimum security facility<br><br>Universal: n=471<br>Client-initiated: n=362 | <b>Universal:</b><br>PCR<br><br>Opt-in<br><br><b>Client-initiated:</b><br>PCR<br><br>Client-initiated | All incarcerated women<br><br>At entry (timing NR)<br><br>NR<br><br>Incarcerated women with symptoms<br><br>At entry (timing NR)<br><br>NR | NR<br><br>NR | 44%<br><br>14%  | NR                           | NR                           | NR    | NR                   | Very low          |
| <b>Opt-in at release</b>                       |                                                                                                      |                                                                                                       |                                                                                                                                            |              |                 |                              |                              |       |                      |                   |
| Sieck, 2011 [1]<br>USA                         | A male prison housing minimum, medium, close,                                                        | Genital swab test, not further specified                                                              | All inmates scheduled for release                                                                                                          | 37.6%        | 5.5%            | NR                           | NR                           | NR    | NR                   | Very low          |

|                       |                                       |        |                                                                                                      |  |  |  |  |  |  |  |
|-----------------------|---------------------------------------|--------|------------------------------------------------------------------------------------------------------|--|--|--|--|--|--|--|
| Cross-sectional study | and maximum security inmates<br>n=916 | Opt-in | At release (4-6 weeks before the scheduled release day)<br><br>Letter describing STD testing process |  |  |  |  |  |  |  |
|-----------------------|---------------------------------------|--------|------------------------------------------------------------------------------------------------------|--|--|--|--|--|--|--|

NR=not reported, PCR=polymerase chain reaction, STD=sexually transmitted disease, USA=United States of America

**Web Table 11: Included records on active case finding for active TB**

| Reference, country, study design                          | Prison setting, sample                         | Testing method, offer                                                                                                                                                                                  | Who, when, promotion                                                                                                                                                                        | Uptake                                                                      | Positivity rate                              | Change in number or % tested | Change prevalence /incidence                                                                                                  | Other                                                                                                                                              | Treatment initiation | Level of evidence |
|-----------------------------------------------------------|------------------------------------------------|--------------------------------------------------------------------------------------------------------------------------------------------------------------------------------------------------------|---------------------------------------------------------------------------------------------------------------------------------------------------------------------------------------------|-----------------------------------------------------------------------------|----------------------------------------------|------------------------------|-------------------------------------------------------------------------------------------------------------------------------|----------------------------------------------------------------------------------------------------------------------------------------------------|----------------------|-------------------|
| <b>At entry</b>                                           |                                                |                                                                                                                                                                                                        |                                                                                                                                                                                             |                                                                             |                                              |                              |                                                                                                                               |                                                                                                                                                    |                      |                   |
| Ritter, 2012 [51]<br>Switzerland<br>Cross-sectional study | Largest re-mand prison<br>n=4,890              | TST, followed by CXR and culture test<br><br>Opt-in                                                                                                                                                    | Inmates entering prison<br><br>At entry (within 7 days of admission)<br><br>NR                                                                                                              | 77.3% TST<br><br>67.1% CXR of TST-positives                                 | 46.9% TST-positive<br><br>2.3% confirmed TB  | NR                           | NR                                                                                                                            | NR                                                                                                                                                 | NR                   | Very low          |
| Saunders, 2001 [52]<br>USA<br>Surveillance study          | One federal detention centre<br>n=NR           | <i>January-May 1998</i><br>TST, and routine screening of symptoms, followed by radiography and culture test<br><br>NR<br><br><i>June-December 1998</i><br>CXR in addition to screening above<br><br>NR | Inmates entering detention centre<br><br>At entry (TST within 48 hours of admission)<br><br>NR<br><br>Inmates entering detention centre<br><br>At intake (CXR directly at intake)<br><br>NR | NR<br><br>NR<br><br>(91% of inmates screened with CXR also had TST reading) | NR<br><br>40% TST-positive                   | NR                           | Eightfold increase in isolations for suspected pulmonary TB in June-December 1998 compared to January-May 1998 (from 8 to 64) | Time to isolation of suspected TB cases decreased in June-December 1998 compared to January May 1998 (from 96 to ≤24 hours from time of admission) | NR                   | Very low          |
| Puisis, 1996 [53]<br>USA<br>Before-after study            | One county jail<br><br>-1991-1992:<br>n=62,281 | <i>March 1991-February 1992</i><br>TST, followed by CXR and culture test                                                                                                                               | Inmates entering jail<br><br>At intake (timing NR)<br><br>NR                                                                                                                                | 75% TST                                                                     | 11.6% TST-positive<br><br>0.06% confirmed TB | NR                           | NR                                                                                                                            | NR                                                                                                                                                 | NR                   | Very low          |

|                                         |                                                       |                                                                                 |                                                                                                                                                      |                        |                                                                                                       |    |    |                                                                                                                                                                                                                                                 |       |                      |
|-----------------------------------------|-------------------------------------------------------|---------------------------------------------------------------------------------|------------------------------------------------------------------------------------------------------------------------------------------------------|------------------------|-------------------------------------------------------------------------------------------------------|----|----|-------------------------------------------------------------------------------------------------------------------------------------------------------------------------------------------------------------------------------------------------|-------|----------------------|
|                                         | -1992-1994:<br>n=NR<br>(n=126, 608 screened)          | NR                                                                              |                                                                                                                                                      |                        |                                                                                                       |    |    |                                                                                                                                                                                                                                                 |       |                      |
|                                         |                                                       | <i>March 1992-February 1994</i><br>Miniature CXR only, followed by culture test |                                                                                                                                                      | NR                     | 0.3% suspicious radiographs<br><br>0.05% confirmed TB (0.03% newly diagnosed TB)                      |    |    |                                                                                                                                                                                                                                                 |       |                      |
| Bös L, 2011 [54]                        | Prison Hospital in Berlin<br><br>All prisoners (n=NR) | Chest X-ray<br><br>Opt-in                                                       | Inmates, not further specified<br><br>At entry<br><br>NR                                                                                             | 100%                   | 62 cases of active TB                                                                                 | NR | NR | The affected prisoners were mainly male (93.6%) and were of a foreign nationality in the majority of cases (61.3%)<br><br>22.6% of the affected prisoners were asymptomatic at entry into the prison, 25% reported only dry or productive cough | 87.1% | Unpublished research |
| <b>During imprisonment</b>              |                                                       |                                                                                 |                                                                                                                                                      |                        |                                                                                                       |    |    |                                                                                                                                                                                                                                                 |       |                      |
| Kiter, 2003 [55]                        | One district prison<br><br>n=NR                       | Miniature CXR, followed by standard CXR and culture test<br><br>Opt-in          | Prison inmates<br><br>Yearly during imprisonment<br><br>Informed about TB and its control, reluctant prisoners are encouraged by other inmates/staff | 99.8%                  | 3.2% abnormal miniature CXR and/or symptoms<br><br>0.4% confirmed TB (of which 72.7% newly diagnosed) | NR | NR | NR                                                                                                                                                                                                                                              | 100%  | Very low             |
| <b>At entry and during imprisonment</b> |                                                       |                                                                                 |                                                                                                                                                      |                        |                                                                                                       |    |    |                                                                                                                                                                                                                                                 |       |                      |
| Martin, 2001 [56]                       | One prison<br><br>n=3,081                             | TST, followed by CXR and sputum examination<br><br>NR                           | Inmates entering prison<br><br>At entry (timing NR), and annually when not ill, or twice-                                                            | At entry: 82.5%<br>TST | At entry: 0.24%<br><br>During imprisonment: 2.2% (6.39/1000/year)                                     | NR | NR | Inmates who did not submit to LTBI therapy showed greater probability of developing TB (adjusted RR 8.32,                                                                                                                                       | NR    | Very low             |

|                                                       |                                    |                                                                             |                                                                          |    |                                         |    |    |                                                                       |      |                     |
|-------------------------------------------------------|------------------------------------|-----------------------------------------------------------------------------|--------------------------------------------------------------------------|----|-----------------------------------------|----|----|-----------------------------------------------------------------------|------|---------------------|
| Longitudinal study                                    |                                    |                                                                             | yearly radiograph if necessary<br>NR                                     |    |                                         |    |    | 95% CI 1.1-63.5, p=0.04) compared to those submitting to LTBI therapy |      |                     |
| Andreev V, 2011 [57]<br>Bulgaria<br>Prospective study | One prison<br>n=600                | Symptom questionnaire, bacteriology and chest radiography<br>NR             | Inmates, not further specified<br>At entry and during imprisonment<br>NR | NR | 2/600 (0.3%)                            | NR | NR | NR                                                                    | 100% | Conference abstract |
| <b>Timing not specified</b>                           |                                    |                                                                             |                                                                          |    |                                         |    |    |                                                                       |      |                     |
| Miller, 2006 [58]<br>USA<br>Cross-sectional study     | County jail facilities<br>n=22,920 | TST, followed by additional evaluation (not further specified)<br>Mandatory | Jail inmates<br>NR<br>NR                                                 | NA | 1.3% TST-positive<br>0.03% confirmed TB | NR | NR | NR                                                                    | 100% | Very low            |

ACF=acid-fast bacilli, CI=confidence interval, CXR=chest x-ray, LTBI=latent tuberculosis infection, NA=not applicable, NR=not reported, TB=tuberculosis, TST=tuberculin skin test

**Web Table 12: Included records on active case finding for LTBI**

| Reference, country, study design                 | Prison setting, sample                       | Testing method, offer                             | Who, when, promotion                                                                                                      | Uptake    | Positivity rate          | Change in number or % tested | Change prevalence /incidence | Other | Treatment initiation | Level of evidence   |
|--------------------------------------------------|----------------------------------------------|---------------------------------------------------|---------------------------------------------------------------------------------------------------------------------------|-----------|--------------------------|------------------------------|------------------------------|-------|----------------------|---------------------|
| <b>At entry</b>                                  |                                              |                                                   |                                                                                                                           |           |                          |                              |                              |       |                      |                     |
| Martin, 2001 [56]<br>Spain<br>Longitudinal study | One prison<br>n=3,081                        | TST, followed by CXR and sputum examination<br>NR | Inmates entering prison<br>At entry (timing NR), and annually when not ill, or twice-yearly radiograph if necessary<br>NR | 82.5% TST | 41.3% <sup>1</sup>       | NR                           | NR                           | NR    | 23.0%                | Very low            |
| Bock, 2001 [59]<br>USA<br>Longitudinal study     | One county jail<br>n=NR                      | TST, followed by CXR<br>NR                        | All inmates admitted to jail<br>At entry (timing NR)<br>NR                                                                | 75% TST   | 7.2% TST-positive        | NR                           | NR                           | NR    | NR                   | Very low            |
| Foschi A 2015 [5]                                | Single prison in Italy (Opera prison, Milan) | TST, IGRA in TST positive                         | All prisoners<br>At entry                                                                                                 | 81.4%     | TST positivity rate=9.8% | NR                           | NR                           | NR    | NR                   | Conference abstract |

|                                                               |                                         |                |                                                                       |                       |                                               |    |    |                                                                                                                                                                                                                |    |                                                        |
|---------------------------------------------------------------|-----------------------------------------|----------------|-----------------------------------------------------------------------|-----------------------|-----------------------------------------------|----|----|----------------------------------------------------------------------------------------------------------------------------------------------------------------------------------------------------------------|----|--------------------------------------------------------|
| Italy<br>Cross-sectional study                                | N=711                                   | Opt-in         | Motivational counselling                                              |                       | TST+IGRA positivity rate= 48.3%               |    |    |                                                                                                                                                                                                                |    |                                                        |
| Ruiz Rodriguez 2010 [60]<br>Spain<br>Cross-sectional study    | Spanish penitentiary system<br>N=24,101 | TST<br>NR      | All prisoners<br>At entry<br>NR                                       | 11.6% tested with TST | NR                                            | NR | NR | NR                                                                                                                                                                                                             | NR | Conference abstract                                    |
| Solè M 2010 [61]<br>Spain<br>Prospective study                | Single prison in Catalonia<br>N=134     | TST<br>NR      | Foreign prisoners with unknown TB status<br>At entry<br>NR            | 100%                  | 63 (49.3%)                                    | NR | NR | In multivariate analysis, only age (<40 years) associated with TST positivity (OR 2.34, CI95% 1.39-3.94).                                                                                                      | NR | Conference abstract                                    |
| García Guerrero J 2010 [62]<br>Spain<br>Cross-sectional study | 18 prisons in Spain<br>N= 378           | TST<br>NR      | Randomly selected patients<br>At entry<br>NR                          | 90.2%                 | 50.4%                                         | NR | NR | The logistic regression model showed the independent association of TST positivity with: age >40 years (OR: 1.76; CI: 1.08-2.87; p=0.024) and length of prison stay >5 years (OR: 2.50; CI: 1.41-4.43; p=0.002 | NR | Scientific paper (Rev Esp Sanid Penit 2010; 12: 79-85) |
| Martin, 2001 [63]                                             | One prison                              | - TST: Mantoux | Prisoners without previous active TB from September 1995 to June 1999 | NR                    | Positivity rate at second TST: 11.7% (56/478) | NR | NR | NR                                                                                                                                                                                                             | NR | Scientific paper (Rev Esp Sanid                        |

|                                                                                       |                                                                |                                                                                                |                                                                                                                                               |       |                                                                 |                                                                                                                                                                                                             |    |                                                                                                                                          |    |    |                       |
|---------------------------------------------------------------------------------------|----------------------------------------------------------------|------------------------------------------------------------------------------------------------|-----------------------------------------------------------------------------------------------------------------------------------------------|-------|-----------------------------------------------------------------|-------------------------------------------------------------------------------------------------------------------------------------------------------------------------------------------------------------|----|------------------------------------------------------------------------------------------------------------------------------------------|----|----|-----------------------|
| Spain<br>Cross-sectional study                                                        | 478 prisoners with first negative TST result                   | - TST repeated after 7-10 days to prisoners with negative result at first TST<br><br>Voluntary | At prison entry<br><br>NR                                                                                                                     |       |                                                                 | In the multivariate analysis, inmates older than 34 (OR = 3.63, CI 1.9-6.8) and showing signs of induration in the first test (OR = 8.9, CI 48-17.9) demonstrated higher positivity rates in the second TST |    |                                                                                                                                          |    |    | Penit 2001; 3: 72-76) |
| <b>During imprisonment</b>                                                            |                                                                |                                                                                                |                                                                                                                                               |       |                                                                 |                                                                                                                                                                                                             |    |                                                                                                                                          |    |    |                       |
| Sagnelli, 2012 [6]<br><br>Italy<br><br>Cross-sectional study                          | Six penitentiaries<br><br>n=3,468                              | PPD test<br><br>Opt-in                                                                         | All inmates<br><br>During imprisonment<br><br>Presentation on advantages of screening by peer-educators, pamphlets on importance of screening | 42.8% | 17.2%                                                           | Higher acceptance than in the nine correctional facilities evaluated in this study before peer-education (11.3%)                                                                                            | NR | NR                                                                                                                                       | NR | NR | Very low              |
| Ruiz-Rodríguez 2010 [64]<br><br>Spain<br><br>Retrospective, longitudinal cohort study | Single prison (Centro Penitenciario de Albolote)<br><br>N= 197 | TST<br><br>NR                                                                                  | Prisoners with first negative TST and TST repeated in the period considered<br><br>During imprisonment<br><br>NR                              | 100%  | 38 (19.3%) tested positive at TST during the period considered. | NR                                                                                                                                                                                                          | NR | No prisoner exposed to active TB cases became TST positive. HIV infection increased the risk of TST positivity (OR 3.82, CI 1.003-24.87) | NR | NR | Conference abstract   |
| Vera 2010 [65]<br><br>Spain<br><br>Retrospective, longitudinal cohort study           | 18 prisons in Spain<br><br>N= 378 prisoners                    | TST<br><br>NR                                                                                  | 21 prisoners for each prison<br><br>During imprisonment<br><br>NR                                                                             | 90.2% | 50.4%                                                           | NR                                                                                                                                                                                                          | NR | Risk factors:<br>-Age > 40 years<br>-Prison stay > 5 years                                                                               | NR | NR | Conference abstract   |

|                                                                                      |                                                          |               |                                                                                                                       |       |                                                                                            |                                                                                                   |                                                                                                                                                                                              |                                                                                                                                                                                    |    |                     |
|--------------------------------------------------------------------------------------|----------------------------------------------------------|---------------|-----------------------------------------------------------------------------------------------------------------------|-------|--------------------------------------------------------------------------------------------|---------------------------------------------------------------------------------------------------|----------------------------------------------------------------------------------------------------------------------------------------------------------------------------------------------|------------------------------------------------------------------------------------------------------------------------------------------------------------------------------------|----|---------------------|
| Fernández-Prieto P 2010 [66]<br>Spain<br>Retrospective study                         | Single prison in Spain<br>N= 2871 prisoners              | TST<br>NR     | All prisoners<br>During imprisonment<br>NR                                                                            | 92.6% | 21.8%                                                                                      | NR                                                                                                | NR                                                                                                                                                                                           | NR                                                                                                                                                                                 | NR | Conference abstract |
| Gabbuti A 2010 [67]<br>Italy<br>Retrospective longitudinal study                     | Single prison in Italy (Sollicciano, Tuscany)<br>N=7,500 | TST<br>Opt-in | All prisoners<br>During imprisonment<br>NR                                                                            | 15.4% | TST >5 mm: 482/1160 (41.6%)<br>Percentage of TST conversion (2004-2009): 128/ 1160 (11.x%) | NR                                                                                                | NR                                                                                                                                                                                           | NR                                                                                                                                                                                 | NR | Conference abstract |
| Babudieri S 2012 [9]<br>Italy<br>Cross-sectional study                               | 20 Italian prisons<br>N=4,072 detainees                  | TST<br>Opt-in | All prisoners<br>During imprisonment<br>Peer educators and ID specialist intervention to increase TB screening uptake | NR    | 21.8%                                                                                      | Percentage of tested inmates increased from 11.3% (pre intervention) to 26.3% (post intervention) | NR                                                                                                                                                                                           | NR                                                                                                                                                                                 | NR | Conference abstract |
| <b>At entry and during imprisonment</b>                                              |                                                          |               |                                                                                                                       |       |                                                                                            |                                                                                                   |                                                                                                                                                                                              |                                                                                                                                                                                    |    |                     |
| Vera-Remartinez 2014 [68]<br>Spain<br>Longitudinal study, observational cohort study | Single prison (Centro Penitenciario Castellon I)<br>NR   | TST<br>NR     | Inmates, not further specified<br>At entry and during imprisonment (every 6 months)<br>NR                             | 100%  | 44.9%                                                                                      | NR                                                                                                | In new entries positivity rate was:<br>7.3% at 6 months<br>11.9% at 12 months<br>12.5% at 18 months<br>In previous residents:<br>10.6% at 6 months<br>15.1% at 12 months<br>18% at 18 months | Overall risk of TST positivity associated with:<br>-Male sex, OR 1.91 (95% CI 1.05-3.95)<br>-Foreigner, OR 2.25 (95% CI 1.374- 3.61)<br>-Previous IDU, OR 3.05 (95% CI 1.85- 5.05) | NR | Conference abstract |

|                                                            |                                                                            |                                                                             |                                                                          |                                                                |                                      |    |    |                                                                                                        |     |                     |
|------------------------------------------------------------|----------------------------------------------------------------------------|-----------------------------------------------------------------------------|--------------------------------------------------------------------------|----------------------------------------------------------------|--------------------------------------|----|----|--------------------------------------------------------------------------------------------------------|-----|---------------------|
| Ruiz-Rodríguez 2014 [69]<br>Spain<br>Cross-sectional study | Single prison (Centro Penitenciario de Albolote)<br>N=158 female prisoners | TST<br>NR                                                                   | Inmates, not further specified<br>At entry and during imprisonment<br>NR | 99.4%                                                          | 69 (43.9%)<br>14 (20.3%) converters) | NR | NR | Risk increased in patients with >49 years (RR =3.61)<br>No difference between Spaniards and foreigners | NR  | Conference abstract |
| <b>Timing not specified</b>                                |                                                                            |                                                                             |                                                                          |                                                                |                                      |    |    |                                                                                                        |     |                     |
| Miller, 2006 [58]<br>USA<br>Cross-sectional study          | County jail facilities<br>n=22,920                                         | TST, followed by additional evaluation (not further specified)<br>Mandatory | Jail inmates<br>NR<br>NR                                                 | NA                                                             | 0.9% treatment for LTBI prescribed   | NR | NR | NR                                                                                                     | 57% | Very low            |
| Bock, 1999 [70]<br>USA<br>Cross-sectional study            | One pre-trial detention centre<br>n=NR (1,863 screened)                    | TST, followed by CXR<br>NR                                                  | Inmates<br>NR<br>NR                                                      | NR<br>(74% of inmates undergoing TST returned for TST reading) | 18% TST-positive                     | NR | NR | NR                                                                                                     | 58% | Very low            |

CI=confidence interval, CXR=chest x-ray, ID= infectious diseases; LTBI=latent tuberculosis infection, NR=not reported, OR=odds ratio, PPD=purified protein derivative, RR=relative risk, TST=tuberculin skin test

<sup>1</sup>It might be that the 41.3% inmates infected with M. tuberculosis are 6 with active TB and 1,044 with LTBI, however this is not completely clear from the article as it seems that 397 of the 1044 do not seem to be TST positive. Therefore it is unclear whether there are 1,044 or 647 (1,044-397) inmates with LTBI at entry

\*51 (40%) did not complete due to: release in 25 (49%), drop out because of concomitant -methadone therapy in 10 (19.6%), cultural refuse in 12 (23.5%), religious refuse in 3 (5.9%)

**Web Table 13: Included studies reporting economic analysis on active case finding in prison settings**

| Reference, country        | Study design, scenarios                                                                                                         | Level of evidence |
|---------------------------|---------------------------------------------------------------------------------------------------------------------------------|-------------------|
| <b>HCV</b>                |                                                                                                                                 |                   |
| Castelnuovo 2006 [71], UK | Cost-effectiveness study<br>Comparison between different HCV case finding scenarios among former injecting drug users in prison | Moderate          |
| Sutton 2008 [72],         | Cost-effectiveness study                                                                                                        | Moderate          |



|                                 |                                                                                                                                                                                |          |
|---------------------------------|--------------------------------------------------------------------------------------------------------------------------------------------------------------------------------|----------|
| UK                              | Comparison between different HCV case finding scenarios among former injecting drug users in prison                                                                            |          |
| Martin 2013 [73], UK            | Cost-effectiveness study<br>Comparison between HCV case finding among inmates who inject drugs using DBST or venepuncture                                                      | Moderate |
| Sutton 2006 [74], UK            | Cost-effectiveness study<br>Comparison between different HCV case finding scenarios among former injecting drug users in prison                                                | Low      |
| He 2016 [75], USA               | Cost-effectiveness study<br>Comparison between different HCV case finding scenarios including targeted testing for former injecting drug users in prison and universal testing | Moderate |
| <b>HIV</b>                      |                                                                                                                                                                                |          |
| Resch 2005 [76], USA            | Cost-effectiveness study<br>Comparison between different HIV case finding scenarios for pregnant women                                                                         | Moderate |
| Varghese 2001 [77], USA         | Cost-effectiveness study<br>Comparison between universal HIV case finding at release with no intervention                                                                      | Low      |
| Spaulding 2015 [18], USA        | Cross-sectional study<br>Estimate the cost per new HIV diagnosis                                                                                                               | Very low |
| Shrestha 2009 [22], USA         | Cross-sectional study<br>Estimate the cost per new HIV diagnosis                                                                                                               | Very low |
| <b>Chlamydia and gonorrhoea</b> |                                                                                                                                                                                |          |
| Gift 2006 [78], USA             | Cost-effectiveness study<br>Comparison between different case finding scenarios among male inmates                                                                             | Very low |
| Gopalappa 2013 [79], USA        | Cost-effectiveness study<br>Comparison between different case finding scenarios among male inmates                                                                             | Very low |
| Kraut-Becher 2004 [80], USA     | Cost-effectiveness study                                                                                                                                                       | Very low |

|                               |                                                                                                              |          |
|-------------------------------|--------------------------------------------------------------------------------------------------------------|----------|
|                               | Comparison between different case finding scenarios among male and female inmates                            |          |
| <b>Active TB</b>              |                                                                                                              |          |
| Winetsky 2012 [81],<br>Latvia | Cost-effectiveness study<br><br>Comparison between different case finding scenarios and diagnostic algorithm | Moderate |
| Jones 2001 [82],<br>USA       | Cost-effectiveness study<br><br>Comparison between different case finding scenarios and diagnostic algorithm | Low      |
| Miller 2006 [58],<br>USA      | Cross-sectional study<br><br>Economic evaluation of a state-mandatory screening program                      | Very low |

DBST: dried blood spot testing

**Web Table 14: Included studies reporting other data/only qualitative data on active case finding in prison settings**

| Reference, country              | Study design, sample                     | Level of evidence |
|---------------------------------|------------------------------------------|-------------------|
| <b>HCV</b>                      |                                          |                   |
| Nijhawan 2010 [83],<br>USA      | Survey study<br><br>n=100 female inmates | Very low          |
| Vallabhaneni 2006<br>[84]USA    | Survey study<br><br>n=153 inmates        | Very low          |
| <b>HIV</b>                      |                                          |                   |
| Burchell 2003 [85],<br>Canada   | Survey study<br><br>n=595 inmates        | Very low          |
| Grodensky 2015 [86],<br>USA     | Survey study<br><br>n=871 inmates        | Very low          |
| Sabin 2001 [87],<br>USA         | Surveillance study<br><br>n=NR           | Very low          |
| Seth 2015 [88],<br>USA          | Surveillance study<br><br>n=NR           | Very low          |
| <b>Chlamydia and gonorrhoea</b> |                                          |                   |
| Nijhawan 2010 [83],             | Survey study                             | Very low          |

|                              |                                                        |          |
|------------------------------|--------------------------------------------------------|----------|
| USA                          | n=100 female inmates                                   |          |
| <b>TB</b>                    |                                                        |          |
| Aerts 2006 [89],<br>Europe   | Survey study<br>n=NR (representatives of 22 countries) | Very low |
| Binswanger 2010 [90],<br>USA | Survey study<br>n=1,174 jail administrators            | Very low |

NR=not reported

## Web Appendix 6. References

1. Sieck CJ, Dembe AE. Results of a pilot study of pre-release STD testing and inmates' risk behaviors in an Ohio prison. *Journal of urban health : bulletin of the New York Academy of Medicine*. 2011 Aug;88(4):690-9.
2. Jacomet C, Guyot-Lenat A, Bonny C, Henquell C, Rude M, Dydymski S, et al. Addressing the challenges of chronic viral infections and addiction in prisons: the PRODEPIST study. *European journal of public health*. 2016 Feb;26(1):122-8.
3. Rumble C, Pevalin DJ, O'Moore E. Routine testing for blood-borne viruses in prisons: a systematic review. *European journal of public health*. 2015 Dec;25(6):1078-88.
4. Gabbuti A. Misura per la terapia dell' infezione cronica HBV. Collegamento con i SerT, Comunità terapeutiche. Attivazione assistenza domiciliare per i pazienti a gli arresti domiciliari. 2015 (unpublished).
5. Foschi A. The epidemiology of HIV, HBV AND HCV, Syphilis and tuberculosis in a major italian correctional house: a one year infectious disease screening experience. 2015.
6. Sagnelli E, Starnini G, Sagnelli C, Monarca R, Zumbo G, Pontali E, et al. Blood born viral infections, sexually transmitted diseases and latent tuberculosis in italian prisons: a preliminary report of a large multicenter study. *European review for medical and pharmacological sciences*. 2012 Dec;16(15):2142-6.
7. Bedoya A. Evolución 27 años de la hepatitis B en un Centro Penitenciario. *Revista Espanola de Medicina Penitenciaria*. 2014;S16:104.
8. Babudieri S. Eligibilità clinica ed organizzativa alle terapie anti-HCV: lo studio PrHep-EU. 2015.
9. Babudieri S. Addressing BBV infections in italian prisons. 2012.
10. Kuncio DE, Newbern EC, Fernandez-Vina MH, Herdman B, Johnson CC, Viner KM. Comparison of risk-based hepatitis C screening and the true seroprevalence in an urban prison system. *Journal of urban health : bulletin of the New York Academy of Medicine*. 2015 Apr;92(2):379-86.
11. Gabbuti A. Valutazione del possibile numero di Pazienti HCV positivi da trattare in ambito penitenziario a Firenze. 2015 (unpublished).
12. Beckwith CG, Kurth AE, Bazerman LB, Patry EJ, Cates A, Tran L, et al. A pilot study of rapid hepatitis C virus testing in the Rhode Island Department of Corrections. *Journal of public health (Oxford, England)*. 2015 Mar 2.
13. Cocoros N, Nettle E, Church D, Bourassa L, Sherwin V, Cranston K, et al. Screening for Hepatitis C as a Prevention Enhancement (SHAPE) for HIV: an integration pilot initiative in a Massachusetts County correctional facility. *Public health reports (Washington, DC : 1974)*. 2014 Jan-Feb;129 Suppl 1:5-11.
14. Kim AY, Nagami EH, Birch CE, Bowen MJ, Lauer GM, McGovern BH. A simple strategy to identify acute hepatitis C virus infection among newly incarcerated injection drug users. *Hepatology (Baltimore, Md)*. 2013 Mar;57(3):944-52.
15. Craine N, Whitaker R, Perrett S, Zou L, Hickman M, Lyons M. A stepped wedge cluster randomized control trial of dried blood spot testing to improve the uptake of hepatitis C antibody testing within UK prisons. *European journal of public health*. 2015 Apr;25(2):351-7.
16. Hickman M, McDonald T, Judd A, Nichols T, Hope V, Skidmore S, et al. Increasing the uptake of hepatitis C virus testing among injecting drug users in specialist drug treatment and prison settings by using dried blood spots for diagnostic testing: a cluster randomized controlled trial. *Journal of viral hepatitis*. 2008 Apr;15(4):250-4.
17. Khaw FM, Stobbart L, Murtagh MJ. 'I just keep thinking I haven't got it because I'm not yellow': a qualitative study of the factors that influence the uptake of Hepatitis C testing by prisoners. *BMC public health*. 2007;7:98.

18. Spaulding AC, MacGowan RJ, Copeland B, Shrestha RK, Bowden CJ, Kim MJ, et al. Costs of Rapid HIV Screening in an Urban Emergency Department and a Nearby County Jail in the Southeastern United States. *PloS one*. 2015;10(6):e0128408.
19. Tartaro C. An Evaluation of an HIV Testing Program in the Jail Setting: Results and Recommendations. *Prison J*. 2013;93(1):57-79.
20. Begier EM, Bennani Y, Forgione L, Punsalang A, Hanna DB, Herrera J, et al. Undiagnosed HIV infection among New York City jail entrants, 2006: results of a blinded serosurvey. *J Acquir Immune Defic Syndr*. 2010 May 1;54(1):93-101.
21. Macgowan R, Margolis A, Richardson-Moore A, Wang T, Lalota M, French PT, et al. Voluntary rapid human immunodeficiency virus (HIV) testing in jails. *Sexually transmitted diseases*. 2009 Feb;36(2 Suppl):S9-13.
22. Shrestha RK, Sansom SL, Richardson-Moore A, French PT, Scalco B, Lalota M, et al. Costs of voluntary rapid HIV testing and counseling in jails in 4 states--advancing HIV Prevention Demonstration Project, 2003-2006. *Sexually transmitted diseases*. 2009 Feb;36(2 Suppl):S5-8.
23. Kivimets K, Uuskula A. HIV testing and counselling in Estonian prisons, 2012 to 2013: aims, processes and impacts. *Euro Surveill*. 2014;19(47):20970.
24. Bauserman RL, Ward MA, Eldred L, Swetz A. Increasing voluntary HIV testing by offering oral tests in incarcerated populations. *American journal of public health*. 2001 Aug;91(8):1226-9.
25. Arriola KR, Braithwaite RL, Kennedy S, Hammett T, Tinsley M, Wood P, et al. A collaborative effort to enhance HIV/STI screening in five county jails. *Public health reports (Washington, DC : 1974)*. 2001 Nov-Dec;116(6):520-9.
26. Rosen DL, Schoenbach VJ, Wohl DA, White BL, Stewart PW, Golin CE. An evaluation of HIV testing among inmates in the North Carolina prison system. *American journal of public health*. 2009 Oct;99 Suppl 2:S452-9.
27. Kassira EN, Bauserman RL, Tomoyasu N, Caldeira E, Swetz A, Solomon L. HIV and AIDS surveillance among inmates in Maryland prisons. *Journal of urban health : bulletin of the New York Academy of Medicine*. 2001 Jun;78(2):256-63.
28. Prestileo T. Infezione da HIV in pazienti detenuti nella Sicilia Occidentale. 2006.
29. Marco A. Prevalencia de diagnóstico tardío y de infección avanzada en los casos con infección por VIH detectados en dos prisiones de Barcelona. *Revista Espanola de Medicina Penitenciaria* 2014;S16:103.
30. Lugo R. Prevalencia de infección por el VIH en población de internos penados en centros penitenciarios, Cataluña 2011. *Revista Espanola de Medicina Penitenciaria* 2012;S14:58.
31. Babudieri S. HIV in European prisons. 2008.
32. Simonsen KA, Shaikh RA, Earley M, Foxall M, Boyle C, Islam KM, et al. Rapid HIV Screening in an Urban Jail: How Testing at Exit With Linkage to Community Care Can Address Perceived Barriers. *The journal of primary prevention*. 2015 Dec;36(6):427-32.
33. Pearson FS, Shafer MS, Dembo R, Del Mar Vega-Debien G, Pankow J, Duvall JL, et al. Efficacy of a process improvement intervention on delivery of HIV services to offenders: a multisite trial. *American journal of public health*. 2014 Dec;104(12):2385-91.
34. Ross MW, Harzke AJ, Scott DP, McCann K, Kelley M. Outcomes of Project Wall Talk: An HIV/AIDS peer education program implemented within the Texas State prison system. *AIDS Education and Prevention*. 2006;18(6):504-17.
35. Gallego C. Prevalencia en infección por el VIH y perfil epidemiológico, inmunoviroológico y terapéutico población penitenciaria catalana. *Revista Espanola de Medicina Penitenciaria*. 2010;S12:85.
36. Monarca R. Studio siero-epidemiologico della patologia infettiva HIV correlata nella popolazione detenuta italiana. 2002.
37. Mertz KJ, Schwebke JR, Gaydos CA, Beidinger HA, Tulloch SD, Levine WC. Screening women in jails for chlamydial and gonococcal infection using urine tests: feasibility, acceptability, prevalence, and treatment rates. *Sexually transmitted diseases*. 2002 May;29(5):271-6.

38. Brown CK, Earley M, Shaikh R, Fickenscher J, Ott J, Person A, et al. Voluntary STD testing and treatment program at a metropolitan correctional facility: evaluation of test acceptability and associated risk factors. *Journal of correctional health care : the official journal of the National Commission on Correctional Health Care*. 2014 Jan;20(1):70-80.
39. Newman SB, Nelson MB, Gaydos CA, Friedman HB. Female prisoners' preferences of collection methods for testing for *Chlamydia trachomatis* and *Neisseria gonorrhoeae* infection. *Sexually transmitted diseases*. 2003 Apr;30(4):306-9.
40. Lopez-Corbeto E. Prevalencia de *C. trachomatis* (CT) y factores de riesgo en población joven penitenciaria, Cataluña 2011-22. *Revista Espanola de Medicina Penitenciaria*. 2012;S14:49.
41. Torrez E. Prácticas sexuales y prevalencia de enfermedades de transmisión sexual en un Centro Penitenciario de jóvenes. *Revista Espanola de Medicina Penitenciaria*. 2010;S12:169.
42. Shaikh RA, Simonsen KA, O'Keefe A, Earley M, Foxall M, Islam KM, et al. Comparison of Opt-In Versus Opt-Out Testing for Sexually Transmitted Infections Among Inmates in a County Jail. *Journal of correctional health care : the official journal of the National Commission on Correctional Health Care*. 2015 Oct;21(4):408-16.
43. Franklin WB, Katyal M, Mahajan R, Parvez FM. Chlamydia and gonorrhea screening using urine-based nucleic acid amplification testing among males entering New York City jails: a pilot study. *Journal of correctional health care : the official journal of the National Commission on Correctional Health Care*. 2012 Apr;18(2):120-30.
44. Broad J, Cox T, Rodriguez S, Mansour M, Mennella C, Murphy-Swallow D, et al. The impact of discontinuation of male STD screening services at a large urban county jail: Chicago, 2002-2004. *Sexually transmitted diseases*. 2009 Feb;36(2 Suppl):S49-52.
45. Cole J, Hotton A, Zawitz C, Kessler H. Opt-out screening for *Chlamydia trachomatis* and *Neisseria gonorrhoeae* in female detainees at Cook County jail in Chicago, IL. *Sexually transmitted diseases*. 2014 Mar;41(3):161-5.
46. Pathela P, Hennessy RR, Blank S, Parvez F, Franklin W, Schillinger JA. The contribution of a urine-based jail screening program to citywide male *Chlamydia* and gonorrhea case rates in New York City. *Sexually transmitted diseases*. 2009 Feb;36(2 Suppl):S58-61.
47. Kahn RH, Scholl DT, Shane SM, Lemoine AL, Farley TA. Screening for syphilis in arrestees: usefulness for community-wide syphilis surveillance and control. *Sexually transmitted diseases*. 2002 Mar;29(3):150-6.
48. Silberstein GS, Coles FB, Greenberg A, Singer L, Voigt R. Effectiveness and cost-benefit of enhancements to a syphilis screening and treatment program at a county jail. *Sexually transmitted diseases*. 2000 Oct;27(9):508-17.
49. Heimberger TS, Chang HG, Birkhead GS, DiFerdinando GD, Greenberg AJ, Gunn R, et al. High prevalence of syphilis detected through a jail screening program. A potential public health measure to address the syphilis epidemic. *Archives of internal medicine*. 1993 Aug 9;153(15):1799-804.
50. Roth AM, Williams JA, Ly R, Curd K, Brooks D, Arno J, et al. Changing sexually transmitted infection screening protocol will result in improved case finding for *trichomonas vaginalis* among high-risk female populations. *Sexually transmitted diseases*. 2011 May;38(5):398-400.
51. Ritter C, Elger BS. Prevalence of positive tuberculosis skin tests during 5 years of screening in a Swiss remand prison. *Int J Tuberc Lung Dis*. 2012 Jan;16(1):65-9.
52. Saunders DL, Olive DM, Wallace SB, Lacy D, Leyba R, Kendig NE. Tuberculosis screening in the federal prison system: an opportunity to treat and prevent tuberculosis in foreign-born populations. *Public health reports (Washington, DC : 1974)*. 2001 May-Jun;116(3):210-8.
53. Puisis M, Feinglass J, Lidow E, Mansour M. Radiographic screening for tuberculosis in a large urban county jail. *Public health reports (Washington, DC : 1974)*. 1996 Jul-Aug;111(4):330-4.
54. Bös L. Tuberkulose im Justizvollzug. 2011 (unpublished).
55. Kiter G, Arpaz S, Keskin S, Sezgin N, Budin D, Seref O. Tuberculosis in Nazilli District Prison, Turkey, 1997-2001. *Int J Tuberc Lung Dis*. 2003 Feb;7(2):153-8.

56. Martin V, Guerra JM, Cayla JA, Rodriguez JC, Blanco MD, Alcoba M. Incidence of tuberculosis and the importance of treatment of latent tuberculosis infection in a Spanish prison population. *Int J Tuberc Lung Dis*. 2001 Oct;5(10):926-32.
57. Andreev V. Tuberculosis in prison. *Eur Respir J*. 2011;38(s55):804s.
58. Miller TL, Hilsenrath P, Lykens K, McNabb SJ, Moonan PK, Weis SE. Using cost and health impacts to prioritize the targeted testing of tuberculosis in the United States. *Annals of epidemiology*. 2006 Apr;16(4):305-12.
59. Bock NN, Rogers T, Tapia JR, Herron GD, DeVoe B, Geiter LJ. Acceptability of short-course rifampin and pyrazinamide treatment of latent tuberculosis infection among jail inmates. *Chest*. 2001 Mar;119(3):833-7.
60. Ruiz-Rodriguez F. El control de la tuberculosis en las prisiones. *Revista Espanola de Medicina Penitenciaria*. 2010;S12:18-20.
61. Solè N. Prevalencia en infecci3n tuberculosa en la poblaci3n penitenciaria de origen inmigrante que ingresa en una prisi3n de preventivos. *Revista Espanola de Medicina Penitenciaria*. 2010;S12:173.
62. Garc3a Guerrero J. Multi-centre study on the prevalence of latent TB infection among inmates in Spanish prisons. *Rev Esp Sanid Penit*. 2010;12:79-85.
63. Mart3n. ¿Es 3til repetir la prueba de la tuberculina (fen3meno Booster) para la detecci3n de infecci3n tuberculosa al ingreso en prisi3n? *Rev Esp Sanid Penit*. 2001;3:72-6.
64. Ruiz-Rodr3guez. Positivaci3n de la Prueba de la Tuberculina en un Centro Penitenciario. *Revista Espanola de Medicina Penitenciaria*. 2010;S12:86.
65. Vera E. Prevalencia de infecci3n tuberculosa latente y sus factores asociados en los internados en prisiones espa3olas. *Revista Espanola de Medicina Penitenciaria*. 2010;S12:90-1.
66. Fernandez-Prieto P. Tuberculosis y Enfermer3a. *Revista Espanola de Medicina Penitenciaria*. 2010;S12:185-6.
67. Gabbuti A. Il rischio Tuberculosis per i detenuti ed operatori penitenziari. 2010.
68. Vera-Remartinez. Prevalencia e incidencia de infecci3n tuberculosa latente en un Centro Penitenciario. *Revista Espanola de Medicina Penitenciaria*. 2014;S16:105.
69. Ruiz-Rodr3guez. Conversion de la prueba tubercul3nica en un Centro Penitenciario. *Revista Espanola de Medicina Penitenciaria*. 2014;S16:110.
70. Bock NN, Metzger BS, Tapia JR, Blumberg HM. A tuberculin screening and isoniazid preventive therapy program in an inner-city population. *American journal of respiratory and critical care medicine*. 1999 Jan;159(1):295-300.
71. Castelnuovo E, Thompson-Coon J, Pitt M, Cramp M, Siebert U, Price A, et al. The cost-effectiveness of testing for hepatitis C in former injecting drug users. *Health technology assessment (Winchester, England)*. 2006 Sep;10(32):iii-iv, ix-xii, 1-93.
72. Sutton AJ, Edmunds WJ, Sweeting MJ, Gill ON. The cost-effectiveness of screening and treatment for hepatitis C in prisons in England and Wales: a cost-utility analysis. *Journal of viral hepatitis*. 2008 Nov;15(11):797-808.
73. Martin NK, Hickman M, Miners A, Hutchinson SJ, Taylor A, Vickerman P. Cost-effectiveness of HCV case-finding for people who inject drugs via dried blood spot testing in specialist addiction services and prisons. *BMJ open*. 2013;3(8).
74. Sutton AJ, Edmunds WJ, Gill ON. Estimating the cost-effectiveness of detecting cases of chronic hepatitis C infection on reception into prison. *BMC public health*. 2006;6:170.
75. He T, Li K, Roberts MS, Spaulding AC, Ayer T, Grefenstette JJ, et al. Prevention of Hepatitis C by Screening and Treatment in U.S. Prisons. *Annals of internal medicine*. 2016 Jan 19;164(2):84-92.
76. Resch S, Altice FL, Paltiel AD. Cost-effectiveness of HIV screening for incarcerated pregnant women. *J Acquir Immune Defic Syndr*. 2005 Feb 1;38(2):163-73.
77. Varghese B, Peterman TA. Cost-effectiveness of HIV counseling and testing in US prisons. *Journal of urban health : bulletin of the New York Academy of Medicine*. 2001 Jun;78(2):304-12.

78. Gift TL, Lincoln T, Tuthill R, Whelan M, Briggs LP, Conklin T, et al. A cost-effectiveness evaluation of a jail-based chlamydia screening program for men and its impact on their partners in the community. *Sexually transmitted diseases*. 2006 Oct;33(10 Suppl):S103-10.
79. Gopalappa C, Huang YL, Gift TL, Owusu-Edusei K, Taylor M, Gales V. Cost-effectiveness of screening men in Maricopa County jails for chlamydia and gonorrhea to avert infections in women. *Sexually transmitted diseases*. 2013 Oct;40(10):776-83.
80. Kraut-Becher JR, Gift TL, Haddix AC, Irwin KL, Greifinger RB. Cost-effectiveness of universal screening for chlamydia and gonorrhea in US jails. *Journal of urban health : bulletin of the New York Academy of Medicine*. 2004 Sep;81(3):453-71.
81. Winetsky DE, Negoescu DM, DeMarchis EH, Almukhamedova O, Dooronbekova A, Pulatov D, et al. Screening and rapid molecular diagnosis of tuberculosis in prisons in Russia and Eastern Europe: a cost-effectiveness analysis. *PLoS Med*. 2012;9(11):e1001348.
82. Jones TF, Schaffner W. Miniature chest radiograph screening for tuberculosis in jails: a cost-effectiveness analysis. *American journal of respiratory and critical care medicine*. 2001 Jul 1;164(1):77-81.
83. Nijhawan AE, Salloway R, Nunn AS, Poshkus M, Clarke JG. Preventive healthcare for underserved women: results of a prison survey. *Journal of women's health (2002)*. 2010 Jan;19(1):17-22.
84. Vallabhaneni S, Macalino GE, Reinert SE, Schwartzapfel B, Wolf FA, Rich JD. Prisoners favour hepatitis C testing and treatment. *Epidemiology and infection*. 2006 Apr;134(2):243-8.
85. Burchell AN, Calzavara LM, Myers T, Schlossberg J, Millson M, Escobar M, et al. Voluntary HIV testing among inmates: sociodemographic, behavioral risk, and attitudinal correlates. *J Acquir Immune Defic Syndr*. 2003 Apr 15;32(5):534-41.
86. Grodensky CA, Rosen DL, Hino S, Golin CE, Wohl DA. Opt-Out HIV Testing of Inmates in North Carolina Prisons: Factors Associated with not Wanting a Test and not Knowing They Were Tested. *AIDS and behavior*. 2016 Sep 19.
87. Sabin K, Frey R, Horsley R, Greby S. Characteristics and trends of newly identified HIV infections among incarcerated populations: CDC HIV voluntary counseling, testing, and referral system, 1992-1998. *Journal of Urban Health*. 2001;78(2):241-55.
88. Seth P, Figueroa A, Wang G, Reid L, Belcher L. HIV Testing, HIV Positivity, and Linkage and Referral Services in Correctional Facilities in the United States, 2009-2013. *Sexually transmitted diseases*. 2015 Nov;42(11):643-9.
89. Aerts A, Hauer B, Wanlin M, Veen J. Tuberculosis and tuberculosis control in European prisons. *Int J Tuberc Lung Dis*. 2006 Nov;10(11):1215-23.
90. Binswanger IA, O'Brien K, Benton K, Gardner EM, Hirsh JM, Felton S, et al. Tuberculosis testing in correctional officers: a national random survey of jails in the United States. *Int J Tuberc Lung Dis*. 2010 Apr;14(4):464-70.
